# Supplementary material for: Viability and management of the Asian elephant (Elephas maximus) population in the Endau Rompin landscape, Peninsular Malaysia
Source: PeerJ. 2020 Jan 24;8:e8209. doi: 10.7717/peerj.8209 (PMC6984340; doi:10.7717/peerj.8209)
Supplement: Supplemental Information 3 [file peerj-08-8209-s004.xls]

## Sheet: MainDataSheet
Notes:
NA= not available (e.g.: GPS reading)
FOUND= found the specimen
LOST = Use this if the dung cannot be found anymore because it was gone due to flood, and other natural phenomena (please add comments why it was lost!!!)
DID NOT MONITOR = Use this if you did not monitor the dung pile. Please justify why you didn't monitor.
Use only S1, S2, S3, S4, S5 for classification.
n=uncountable, fresh but disintegrated
Dung pile label		# of boli	GPS reading		Location	On the trail? (Y/N)	Vegetation type	slope	altitud	FRESH DUNG PILE MONITORING
			x	y						0			30				60				90				120				150				180				210				240				270				300
										state	days	date	state		date	days	state		date	days	state		date	days	state		date	days	state		date	days	state		date	days	state		date	days	state		date	days	state		date	days	state
E001	2007-09-05	7	585210	266003	Pohon Derian	N	Secondary forest	19	91	Fresh	0	2007-09-05	FOUND		2007-10-13	39	Did not monitor				Did not monitor				Did not monitor				FOUND		2008-02-24	173	FOUND		2008-03-22	200
E002	2007-09-05	7 to 8	585350	265901	Pohon Derian	Y	Secondary forest	2	109	Fresh	0	2007-09-05	FOUND		2007-10-13	39	Did not monitor				Did not monitor				Did not monitor				FOUND		2008-02-24	173	LOST		2008-03-22	200
E003	2007-09-05	6	585489	265766	Pohon Derian	Y	Secondary forest	4	69	Fresh	0	2007-09-05	FOUND		2007-10-13	39	Did not monitor				Did not monitor				Did not monitor				FOUND		2008-02-24	173	FOUND		2008-03-22	200
E004	2007-09-06	4	585514	265776	Pohon Derian	Y	Secondary forest	11	63	Fresh	0	2007-09-06	FOUND		2007-10-13	38	Did not monitor				Did not monitor				Did not monitor				FOUND		2008-02-24	172	FOUND		2008-03-22	199
E005	2007-09-06	7	585514	265776	Pohon Derian	Y	Secondary forest	4	63	Fresh	0	2007-09-06	FOUND		2007-10-13	38	Did not monitor				Did not monitor				Did not monitor				FOUND		2008-02-24	172	FOUND		2008-03-22	199
E006	2007-09-06	3	585514	265776	Pohon Derian	Y	Secondary forest	3	63	Fresh	0	2007-09-06	FOUND		2007-10-13	38	Did not monitor				Did not monitor				Did not monitor				FOUND		2008-02-24	172	FOUND		2008-03-22	199
E007	2007-09-06	5	585523	265836	Pohon Derian	N	Secondary forest	17	93	Fresh	0	2007-09-06	FOUND		2007-10-13	38	Did not monitor				Did not monitor				Did not monitor				FOUND		2008-02-24	172	FOUND		2008-03-22	199
E008	2007-09-06	7	585523	265836	Pohon Derian	N	Secondary forest	4	93	Fresh	0	2007-09-06	FOUND		2007-10-13	38	Did not monitor				Did not monitor				Did not monitor				LOST		2008-02-24	172
E009	2007-09-06	4	585601	265886	Pohon Derian	N	Secondary forest	8	63	Fresh	0	2007-09-06	FOUND		2007-10-13	38	Did not monitor				Did not monitor				Did not monitor				FOUND		2008-02-24	172	FOUND		2008-03-22	199
E010	2007-09-06	3	585601	265886	Pohon Derian	N	Secondary forest	8	e	Fresh	0	2007-09-06	FOUND		2007-10-13	38	Did not monitor				Did not monitor				Did not monitor				FOUND		2008-02-24	172	FOUND		2008-03-22	199
E011	2007-09-06	6	585601	265886	Pohon Derian	N	Secondary forest	2	63	Fresh	0	2007-09-06	FOUND		2007-10-13	38	Did not monitor				Did not monitor				Did not monitor				FOUND		2008-02-24	172	FOUND		2008-03-22	199
E012	2007-09-06	5	585601	265886	Pohon Derian	N	Secondary forest	3	63	Fresh	0	2007-09-06	FOUND		2007-10-13	38	Did not monitor				Did not monitor				Did not monitor				FOUND		2008-02-24	172	FOUND		2008-03-22	199
E013	2007-09-06	4	585611	265888	Pohon Derian	N	Secondary forest	10	58	Fresh	0	2007-09-06	FOUND		2007-10-13	38	Did not monitor				Did not monitor				Did not monitor				FOUND		2008-02-24	172	FOUND		2008-03-22	199
E014	2007-09-06	8	585611	265888	Pohon Derian	N	Secondary forest	4	58	Fresh	0	2007-09-06	FOUND		2007-10-13	38	Did not monitor				Did not monitor				Did not monitor				FOUND		2008-02-24	172	FOUND		2008-03-22	199
E015	2007-09-06	6	585611	265888	Pohon Derian	N	Secondary forest	6	58	Fresh	0	2007-09-06	FOUND		2007-10-13	38	Did not monitor				Did not monitor				Did not monitor				FOUND		2008-02-24	172	FOUND		2008-03-22	199
E016	2007-09-06	8 to 9	585611	265888	Pohon Derian	N	Secondary forest	0	58	Fresh	0	2007-09-06	FOUND		2007-10-13	38	Did not monitor				Did not monitor				Did not monitor				FOUND		2008-02-24	172	FOUND		2008-03-22	199
E017	2007-09-06	5	585611	265888	Pohon Derian	N	Secondary forest	2	58	Fresh	0	2007-09-06	FOUND		2007-10-13	38	Did not monitor				Did not monitor				Did not monitor				FOUND		2008-02-24	172	FOUND		2008-03-22	199
E018	2007-09-06	6	585633	265858	Pohon Derian	N	Secondary forest	13	58	Fresh	0	2007-09-06	FOUND		2007-10-13	38	Did not monitor				Did not monitor				Did not monitor				FOUND		2008-02-24	172	FOUND		2008-03-22	199
E019	2007-09-06	7	585633	265858	Pohon Derian	N	Secondary forest	2	30	Fresh	0	2007-09-06	FOUND		2007-10-13	38	Did not monitor				Did not monitor				Did not monitor				FOUND		2008-02-24	172	FOUND		2008-03-22	199
E020	2007-09-06	4 to 5	585633	265858	Pohon Derian	N	Secondary forest	10	30	Fresh	0	2007-09-06	FOUND		2007-10-13	38	Did not monitor				Did not monitor				Did not monitor				FOUND		2008-02-24	172	FOUND		2008-03-22	199
E021	2007-09-06	6	585541	265891	Pohon Derian	N	Secondary forest	10	84	Fresh	0	2007-09-06	FOUND		2007-10-13	38	Did not monitor				Did not monitor				Did not monitor				FOUND		2008-02-24	172	FOUND		2008-03-22	199
E022	2007-09-06	4	585460	265938	Pohon Derian	N	Secondary forest	0	85	Fresh	0	2007-09-06	FOUND		2007-10-13	38	Did not monitor				Did not monitor				Did not monitor				FOUND		2008-02-24	172	FOUND		2008-03-22	199
E023	2007-09-06	6	585460	265938	Pohon Derian	N	Secondary forest	8	85	Fresh	0	2007-09-06	FOUND		2007-10-13	38	Did not monitor				Did not monitor				Did not monitor				LOST		2008-02-24	172
E024	2007-09-06	7	585451	265941	Pohon Derian	N	Secondary forest	2	51	Fresh	0	2007-09-06	FOUND		2007-10-13	38	Did not monitor				Did not monitor				Did not monitor				FOUND		2008-02-24	172	FOUND		2008-03-22	199
E025	2007-09-06	4	585671	265841	Pohon Derian	N	Secondary forest	3	82	Fresh	0	2007-09-06	FOUND		2007-10-13	38	Did not monitor				Did not monitor				Did not monitor				FOUND		2008-02-24	172	FOUND		2008-03-22	199
E026	2007-09-06	4	585671	265841	Pohon Derian	N	Secondary forest	16	82	Fresh	0	2007-09-06	FOUND		2007-10-13	38	Did not monitor				Did not monitor				Did not monitor				FOUND		2008-02-24	172	FOUND		2008-03-22	199
E027	2007-09-06	3	585645	265855	Pohon Derian	N	Secondary forest	2	74	Fresh	0	2007-09-06	FOUND		2007-10-13	38	Did not monitor				Did not monitor				Did not monitor				FOUND		2008-02-24	172	FOUND		2008-03-22	199
E028	2007-09-06	6 to 7	585462	266017	Pohon Derian	N	Secondary forest	3	67	Fresh	0	2007-09-06	FOUND		2007-10-13	38	Did not monitor				Did not monitor				Did not monitor				FOUND		2008-02-24	172	FOUND		2008-03-22	199
E029	2007-09-06	7	585462	266017	Pohon Derian	N	Secondary forest	2	67	Fresh	0	2007-09-06	FOUND		2007-10-13	38	Did not monitor				Did not monitor				Did not monitor				FOUND		2008-02-24	172	FOUND		2008-03-22	199
E030	2007-09-06	5	585462	266017	Pohon Derian	N	Secondary forest	2	67	Fresh	0	2007-09-06	FOUND		2007-10-13	38	Did not monitor				Did not monitor				Did not monitor				FOUND		2008-02-24	172	FOUND		2008-03-22	199
E031	2007-09-06	3	585462	266017	Pohon Derian	N	Secondary forest	2	67	Fresh	0	2007-09-06	FOUND		2007-10-13	38	Did not monitor				Did not monitor				Did not monitor				FOUND		2008-02-24	172	FOUND		2008-03-22	199
E032	2007-09-06	7	585462	266017	Pohon Derian	N	Secondary forest	18	67	Fresh	0	2007-09-06	FOUND		2007-10-13	38	Did not monitor				Did not monitor				Did not monitor				FOUND		2008-02-24	172	FOUND		2008-03-22	199
E033	2007-09-06	8	585456	265996	Pohon Derian	N	Secondary forest	8	82	Fresh	0	2007-09-06	FOUND		2007-10-13	38	Did not monitor				Did not monitor				Did not monitor				FOUND		2008-02-24	172	FOUND		2008-03-22	199
E034	2007-09-06	6	585456	265996	Pohon Derian	N	Secondary forest	4	82	Fresh	0	2007-09-06	FOUND		2007-10-13	38	Did not monitor				Did not monitor				Did not monitor				FOUND		2008-02-24	172	FOUND		2008-03-22	199
E035	2007-09-06	5 to 6	585456	265996	Pohon Derian	N	Secondary forest	0	82	Fresh	0	2007-09-06	FOUND		2007-10-13	38	Did not monitor				Did not monitor				Did not monitor				FOUND		2008-02-24	172	FOUND		2008-03-22	199
E036	2007-09-06	7	585456	265996	Pohon Derian	N	Secondary forest	4	82	Fresh	0	2007-09-06	FOUND		2007-10-13	38	Did not monitor				Did not monitor				Did not monitor				LOST		2008-02-24	172
E037	2007-09-10	6	585194	264911	Kg. Selai Lama	N	Scrub	6	69	Fresh	0	2007-09-10	FOUND		2007-10-13	34	Did not monitor				Did not monitor				Did not monitor				FOUND		2008-02-24	168	FOUND
E038	2007-09-10	7 to 8	586193	264989	Kg. Selai Lama	N	rubber plantation	9	73	Fresh	0	2007-09-10	FOUND		2007-10-12	33	Did not monitor				Did not monitor				Did not monitor				FOUND		2008-02-24	168	FOUND
E039	2007-09-10	4 to 5	586167	264914	Kg. Selai Lama	N	rubber plantation	20	87	Fresh	0	2007-09-10	FOUND		2007-10-12	33	Did not monitor				Did not monitor				Did not monitor				LOST		2008-02-24	168
E040	2007-09-10	4	586167	264914	Kg. Selai Lama	N	Scrub	30	87	Fresh	0	2007-09-10	FOUND		2007-10-12	33	Did not monitor				Did not monitor				Did not monitor				LOST		2008-02-24	168
E041	2007-09-11	8 to 9	585774	265121	Kg. Selai Lama	N	Scrub	6	58	Fresh	0	2007-09-11	FOUND		2007-10-12	32	Did not monitor				Did not monitor				Did not monitor				FOUND		2008-02-24	167	FOUND		2008-03-23	195
E042	2007-09-11	4	585771	265127	Kg. Selai Lama	N	Scrub	4	55	Fresh	0	2007-09-11	FOUND		2007-10-12	32	Did not monitor				Did not monitor				Did not monitor				FOUND		2008-02-24	167	FOUND		2008-03-23	195
E043	2007-09-11	7	585776	265145	Kg. Selai Lama	N	Scrub	2	54	Fresh	0	2007-09-11	FOUND		2007-10-12	32	Did not monitor				Did not monitor				Did not monitor				FOUND		2008-02-24	167	FOUND		2008-03-23	195
E044	2007-09-11	5	585763	265199	Kg. Selai Lama	N	Scrub	20	54	Fresh	0	2007-09-11	FOUND		2007-10-12	32	Did not monitor				Did not monitor				Did not monitor				FOUND		2008-02-24	167	FOUND		2008-03-23	195
E045	2007-09-11	7	585763	265199	Kg. Selai Lama	N	Scrub	0	54	Fresh	0	2007-09-11	FOUND		2007-10-12	32	Did not monitor				Did not monitor				Did not monitor				FOUND		2008-02-24	167	FOUND		2008-03-23	195
E046	2007-09-11	4 to 5	585773	265110	Kg. Selai Lama	N	Scrub	8	47	Fresh	0	2007-09-11	FOUND		2007-10-12	32	Did not monitor				Did not monitor				Did not monitor				FOUND		2008-02-24	167	FOUND		2008-03-23	195
E047	2007-09-11	5	585593	264983	Usung	N	Scrub	24	49	Fresh	0	2007-09-11	FOUND		2007-10-13	33	Did not monitor				Did not monitor				Did not monitor				FOUND		2008-02-24	167	Did not monitor
E048	2007-09-11	3 to 4	585609	264955	Usung	N	Scrub	32	50	Fresh	0	2007-09-11	FOUND		2007-10-13	33	Did not monitor				Did not monitor				Did not monitor				FOUND		2008-02-24	167	Did not monitor
E049	2007-09-11	4	585631	264939	Usung	N	Scrub	30	51	Fresh	0	2007-09-11	FOUND		2007-10-13	33	Did not monitor				Did not monitor				Did not monitor				FOUND		2008-02-24	167	Did not monitor
E050	2007-09-11	4 to 5	585675	264972	Usung	N	Scrub	15	56	Fresh	0	2007-09-11	FOUND		2007-10-13	33	Did not monitor				Did not monitor				Did not monitor				FOUND		2008-02-24	167	Did not monitor
E051	2007-09-11	4	585675	264972	Usung	N	Scrub	7	56	Fresh	0	2007-09-11	FOUND		2007-10-13	33	Did not monitor				Did not monitor				Did not monitor				FOUND		2008-02-24	167	Did not monitor
E052	2007-09-11	4	585674	264946	Usung	N	Scrub	48	48	Fresh	0	2007-09-11	FOUND		2007-10-13	33	Did not monitor				Did not monitor				Did not monitor				FOUND		2008-02-24	167	Did not monitor
E053	2007-09-11	5 to 6	585648	264995	Usung	N	Grassland	64	64	Fresh	0	2007-09-11	FOUND		2007-10-13	33	Did not monitor				Did not monitor				Did not monitor				FOUND		2008-02-24	167	Did not monitor
E054	2007-09-12	6	585670	265020	Usung	N	Grassland	53	53	Fresh	0	2007-09-12	FOUND		2007-10-13	32	Did not monitor				Did not monitor				Did not monitor				FOUND		2008-02-24	166	Did not monitor
E055	2007-09-13	9 to 10	585714	265069	Kg. Selai Lama	Y	Scrub	15	62	Fresh	0	2007-09-13	FOUND		2007-10-12	30	Did not monitor				Did not monitor				Did not monitor				FOUND		2008-02-24	165	FOUND		2008-03-23	193
E056	2007-09-13	6	585852	265110	Kg. Selai Lama	Y	rubber plantation	3	60	Fresh	0	2007-09-13	FOUND		2007-10-12	30	Did not monitor				Did not monitor				Did not monitor				FOUND		2008-02-24	165	FOUND		2008-03-23	193
E057	2007-09-14	7	585996	265174	Kg. Selai Lama	N	Scrub	3	60	Fresh	0	2007-09-14	FOUND		2007-10-12	29	Did not monitor				Did not monitor				Did not monitor				FOUND		2008-02-24	164	FOUND		2008-03-23	192
E058	2007-09-14	8	585991	265143	Kg. Selai Lama	N	Secondary forest	13	47	Fresh	0	2007-09-14	FOUND		2007-10-12	29	Did not monitor				Did not monitor				Did not monitor				FOUND		2008-02-24	164	FOUND		2008-03-23	192
E059	2007-10-10	4	585462	265650	Semampek	N	Secondary forest	9	59	Fresh	0	2007-10-10	Did not monitor				Did not monitor				Did not monitor				FOUND		2008-02-27	141	FOUND		2008-03-23	166
E060	2007-10-10	4 to 5	585438	265647	Semampek	N	Secondary forest	8	NA	Fresh	0	2007-10-10	Did not monitor				Did not monitor				Did not monitor				FOUND		2008-02-27	141	FOUND		2008-03-23	166
E061	2007-10-11	6 to 7	585495	265695	Semampek	N	Secondary forest	4	65	Fresh	0	2007-10-11	Did not monitor				Did not monitor				Did not monitor				Did not monitor				FOUND		2008-03-23	165
E062	2007-10-11	5	585589	265754	Pohon Derian	N	Secondary forest	3	64	Fresh	0	2007-10-11	Did not monitor				Did not monitor				Did not monitor				Did not monitor				FOUND		2008-03-23	165
E063	2007-10-10	4	585607	265814	Pohon Derian	N	Secondary forest	2	60	Fresh	0	2007-10-10	Did not monitor				Did not monitor				Did not monitor				Did not monitor				LOST		2008-03-23	165
E064	2007-10-10	3	585577	265810	Pohon Derian	N	Secondary forest	5	61	Fresh	0	2007-10-10	Did not monitor				Did not monitor				Did not monitor				FOUND		2008-02-24	138	FOUND		2008-03-23	166
E065	2007-10-11	5	585484	265711	Pohon Derian	N	Secondary forest	6	84	Fresh	0	2007-10-11	Did not monitor				Did not monitor				Did not monitor				FOUND		2008-02-24	137	FOUND		2008-03-22	164
E066	2007-10-11	3 to 4	585481	265764	Pohon Derian	N	Secondary forest	5	62	Fresh	0	2007-10-11	Did not monitor				Did not monitor				Did not monitor				Did not monitor				FOUND		2008-03-22	164
E067	2007-10-11	3	585513	265853	Pohon Derian	N	Secondary forest	4	56	Fresh	0	2007-10-11	Did not monitor				Did not monitor				Did not monitor				Did not monitor				FOUND		2008-03-23	165
E068	2007-10-11	4	585524	265864	Pohon Derian	N	Secondary forest	3	71	Fresh	0	2007-10-11	Did not monitor				Did not monitor				Did not monitor				Did not monitor				FOUND		2008-03-23	165
E069	2007-10-11	2	585531	265858	Pohon Derian	N	Secondary forest	2	68	Fresh	0	2007-10-11	Did not monitor				Did not monitor				Did not monitor				Did not monitor				FOUND		2008-03-23	165
E070	2007-10-10	5	585582	265851	Pohon Derian	N	Secondary forest	6	66	Fresh	0	2007-10-10	Did not monitor				Did not monitor				Did not monitor				Did not monitor				FOUND		2008-03-23	166
E071	2007-10-11	6	585499	265871	Pohon Derian	N	Secondary forest	4	67	Fresh	0	2007-10-11	Did not monitor				Did not monitor				Did not monitor				Did not monitor				FOUND		2008-03-22	164
E072	2007-10-11	5 to 6	585499	265871	Pohon Derian	N	Secondary forest	4	67	Fresh	0	2007-10-11	Did not monitor				Did not monitor				Did not monitor				Did not monitor				FOUND		2008-03-22	164
E073	2007-10-11	4	585678	265381	Pohon Derian	N	Secondary forest	8	68	Fresh	0	2007-10-11	Did not monitor				Did not monitor				Did not monitor				FOUND		2008-02-25	138	FOUND		2008-03-22	164
E074	2007-10-10	6	585716	265241	Pohon Derian	N	Secondary forest	7	59	Fresh	0	2007-10-10	Did not monitor				Did not monitor				Did not monitor				FOUND		2008-02-25	139	Did not monitor
E075	2007-10-10	4	585725	265192	Pohon Derian	N	Secondary forest	6	70	Fresh	0	2007-10-10	Did not monitor				Did not monitor				Did not monitor				FOUND		2008-02-25	139	FOUND		2008-03-23	166
E076	2007-10-11	n	585739	265177	Pohon Derian	N	Secondary forest	2	57	Fresh	0	2007-10-11	Did not monitor				Did not monitor				Did not monitor				FOUND		2008-02-25	138	FOUND		2008-03-23	165
E077	2007-10-10	6	585741	265177	Semampek	N	Secondary forest	4	62	Fresh	0	2007-10-10	Did not monitor				Did not monitor				Did not monitor				FOUND		2008-02-25	139	FOUND		2008-03-23	166
E078	2007-10-10	1	585753	265182	Semampek	N	Secondary forest	3	59	Fresh	0	2007-10-10	Did not monitor				Did not monitor				Did not monitor				FOUND		2008-02-25	139	FOUND		2008-03-24	167
E079	2007-10-10	5	585789	265169	Semampek	N	Secondary forest	6	54	Fresh	0	2007-10-10	Did not monitor				Did not monitor				Did not monitor				FOUND		2008-02-25	139	FOUND		2008-03-23	166
E080	2007-10-10	5	585789	265169	Semampek	N	Secondary forest	5	54	Fresh	0	2007-10-10	Did not monitor				Did not monitor				Did not monitor				FOUND		2008-02-25	139	FOUND		2008-03-23	166
E081	2007-10-11	5 to 6	585836	261214	Jalan Balak Kemedak	Y	Secondary forest	12	72	Fresh	0	2007-10-11	Did not monitor				Did not monitor				FOUND		2008-01-26	108	FOUND		2008-02-23	136	FOUND		2008-03-22	164
E082	2007-10-11	4	585205	261228	Jalan Balak Kemedak	Y	Secondary forest	12	84	Fresh	0	2007-10-11	Did not monitor				Did not monitor				FOUND		2008-01-26	108	FOUND		2008-02-23	136	FOUND		2008-03-22	164
E083	2007-10-11	5	586310	261191	Jalan Balak Kemedak	Y	Secondary forest	1	78	Fresh	0	2007-10-11	Did not monitor				Did not monitor				FOUND		2008-01-26	108	Did not monitor				FOUND		2008-03-22	164
E084	2007-10-11	6	585193	261525	Jalan Balak Kemedak	Y	Secondary forest	11	113	Fresh	0	2007-10-11	Did not monitor				Did not monitor				FOUND		2008-01-26	108	Did not monitor				FOUND		2008-03-22	164
E085	2007-10-11	3	584950	261813	Jalan Balak Kemedak	Y	Secondary forest	5	94	Fresh	0	2007-10-11	Did not monitor				Did not monitor				FOUND		2008-01-26	108	Did not monitor				FOUND		2008-03-22	164
E086	2007-10-10	3	585769	265136	Semampek	N	Secondary forest	23	55	Fresh	0	2007-10-10	Did not monitor				Did not monitor				Did not monitor				Did not monitor				FOUND		2008-03-24	167
E087	2007-10-10	7	585726	265141	Semampek	N	Secondary forest	11	61	Fresh	0	2007-10-10	Did not monitor				Did not monitor				Did not monitor				Did not monitor				FOUND		2008-03-24	167
E088	2007-10-11	4	585705	265152	Semampek	N	Secondary forest	18	46	Fresh	0	2007-10-11	Did not monitor				Did not monitor				Did not monitor				Did not monitor				FOUND		2008-03-24	166
E089	2007-10-11	5 to 6	585705	265152	Semampek	N	Secondary forest	4	46	Fresh	0	2007-10-11	Did not monitor				Did not monitor				Did not monitor				Did not monitor				FOUND		2008-03-24	166
E090	2007-10-11	8 to 9	585704	265141	Semampek	N	Secondary forest	4	55	Fresh	0	2007-10-11	Did not monitor				Did not monitor				Did not monitor				Did not monitor				FOUND		2008-03-24	166
E091	2007-10-11	2	585695	265154	Semampek	N	Secondary forest	11	52	Fresh	0	2007-10-11	Did not monitor				Did not monitor				Did not monitor				Did not monitor				FOUND		2008-03-24	166
E092	2007-11-01	4	585423	265409	Semampek	Y	Secondary forest	6	NA	Fresh	0	2007-11-01	Did not monitor				Did not monitor				FOUND		2008-02-24	116	FOUND		2008-03-21	142
E093	2007-11-01	4 to 5	585423	265409	Semampek	Y	Secondary forest	16	NA	Fresh	0	2007-11-01	Did not monitor				Did not monitor				FOUND		2008-02-24		Did not monitor
E094	2007-11-01	n	585436	265435	Semampek	Y	Secondary forest	7	96	Fresh	0	2007-11-01	Did not monitor				Did not monitor				Did not monitor				Did not monitor
E095	2007-11-01	3	585577	265406	Semampek	Y	Secondary forest	18	87	Fresh	0	2007-11-01	Did not monitor				Did not monitor				FOUND		2008-02-25	117	Did not monitor
E096	2007-11-01	n	585569	265369	Semampek	Y	Secondary forest	23	84	Fresh	0	2007-11-01	Did not monitor				Did not monitor				FOUND		2008-02-25	117	Did not monitor
E097	2007-11-03	4	NA	NA	Bkt Kleman	Y	Grass roadside	NA	NA	Fresh	0	2007-11-03	Did not monitor				Did not monitor				FOUND		2008-02-25	115	FOUND		2008-03-21	140
E098	2007-11-03	4	NA	NA	Sg. Manik	N	Secondary Forest	NA	NA	Fresh	0	2007-11-03	Did not monitor				FOUND		2008-01-23	82	FOUND		2008-02-27	117	FOUND		2008-03-23	142
E099	2007-11-03	3	NA	NA	Semampek	N	Secondary Forest	NA	NA	Fresh	0	2007-11-03	Did not monitor				FOUND		2008-01-23	82	FOUND		2008-02-27	117	FOUND		2008-03-23	142
E100	2007-11-03	2	NA	NA	Bkt Kleman	N	Secondary Forest	NA	NA	Fresh	0	2007-11-03	Did not monitor				FOUND		2008-01-23	82	FOUND		2008-02-27	117	FOUND		2008-03-23	142
E101	2007-11-03	3	NA	NA	Bkt Kleman	N	Secondary Forest	NA	NA	Fresh	0	2007-11-03	Did not monitor				FOUND		2008-01-23	82	FOUND		2008-02-27	117	FOUND		2008-03-23	142
E102	2007-11-03	3	NA	NA	Bkt Kleman	N	Secondary Forest	NA	NA	Fresh	0	2007-11-03	Did not monitor				FOUND		2008-01-23	82	FOUND		2008-02-27	117	FOUND		2008-03-23	142
E103	2007-11-03	3	NA	NA	Bkt Kleman	N	Secondary Forest	NA	NA	Fresh	0	2007-11-03	Did not monitor				Did not monitor				Did not monitor				FOUND		2008-03-23	142
E104	2007-11-03	4	NA	NA	Bkt Kleman	NA	NA	NA	NA	Fresh	0	2007-11-03	Did not monitor				Did not monitor				Did not monitor				Did not monitor
E105	2007-11-03	4	NA	NA	Bkt Kleman	NA	NA	NA	NA	Fresh	0	2007-11-03	Did not monitor				Did not monitor				Did not monitor				Did not monitor
E106	2007-11-03	4	NA	NA	Bkt Kleman	NA	NA	NA	NA	Fresh	0	2007-11-03	Did not monitor				Did not monitor				Did not monitor				Did not monitor
E107	2007-11-23	4	585225	265933	Sg. Semampek	N	Secondary forest	12	74	Fresh	0	2007-11-23	Did not monitor				FOUND		2008-01-23	62	FOUND		2008-02-26	96	FOUND		2008-03-21	120
E108	2007-11-23	7 to 8	585225	265933	Sg. Semampek	N	Secondary forest	7	74	Fresh	0	2007-11-24	Did not monitor				FOUND		2008-01-25	64	FOUND		2008-02-26	96	FOUND		2008-03-21	120
E109	2007-11-23	9	585225	265933	Sg. Semampek	N	Secondary forest	4	74	Fresh	0	2007-11-25	Did not monitor				LOST		2008-01-25	64
E110	2007-11-27	4	585197	251477	Jln. Balak Kuala Kemidak	N	Secondary forest	4	88	Fresh	0	2007-11-27	Did not monitor				FOUND		2008-01-26	61	FOUND		2008-02-23	89	Did not monitor
E111	2007-11-27	6 to 8	586105	261248	Jln. Balak Kuala Kemidak	N	Secondary forest	2	89	Fresh	0	2007-11-27	Did not monitor				FOUND		2008-01-26	61	FOUND		2008-02-23	89	Did not monitor		2008-03-22	117
E112	2007-11-27	8	587003	262149	Jln. Balak Kuala Kemidak	N	Secondary forest	2	78	Fresh	0	2007-11-27	Did not monitor				Did not monitor				FOUND		2008-02-23	89	Did not monitor
E113	2007-11-27	n	587558	586030	Jln. Balak Kuala Kemidak	N	Secondary forest	4	93	Fresh	0	2007-11-27	Did not monitor				Did not monitor				FOUND		2008-02-23	89	Did not monitor
E114	2007-11-27	4	586030	265248	Jln. Balak Kuala Kemidak	N	Secondary forest	8	60	Fresh	0	2007-11-27	Did not monitor				Did not monitor				FOUND		2008-02-24	90	Did not monitor
E115	2007-11-25	4	585580	261501	Kg. Selai Lama	N	Scrub	2	58	Fresh	0	2007-11-25	Did not monitor				Did not monitor				FOUND		2008-02-24	90	FOUND		2008-03-23	120
E116	2007-12-03	7 to 8	585401	265451	Sg. Semampek	N	Secondary forest	4	53	Fresh	0	2007-12-03	Did not monitor				Did not monitor				FOUND		2008-03-21	110
E117	2007-12-03	6	585411	265274	Sg. Pencah Burung Mandi/ Sg. Semampek	Y	Secondary forest	8	73	Fresh	0	2007-12-03	Did not monitor				FOUND		2008-02-23	83	FOUND		2008-03-20	109
E118	2007-12-03	8	584849	267240	Bkt Kelemboi	N	Secondary forest	8	113	Fresh	0	2007-12-03	FOUND		2008-01-24	53	FOUND		2008-02-23	83	Did not monitor
E119	2007-12-03	n	585401	265451	Sg. Semampek	N	Secondary forest	3	53	Fresh	0	2007-12-03	Did not monitor				FOUND		2008-02-24	83	FOUND		2008-03-23	112
E120	2007-12-03	n	585974 (2D)	265247	Kebun/ Sg. Semampek	N	Secondary forest	6	NA	Fresh	0	2007-12-03	Did not monitor				FOUND		2008-02-24	83	FOUND		2008-03-23	112
E121	2007-12-03	4	585854	265446	Ibu Sg. Semampek	N	Secondary forest	6	68	Fresh	0	2007-12-03	Did not monitor				Did not monitor				FOUND		2008-03-24	113
E122	2007-12-27	5	581155	264668	Ulu Kemedak	N	Secondary forest	22	87	Fresh	0	2007-12-27	Did not monitor				FOUND		2008-02-26	62	Did not monitor
E123	2007-12-27	6	581113	264636	Ulu Kemedak	N	Secondary forest	4	83	Fresh	0	2007-12-27	Did not monitor				FOUND		2008-02-26	62	Did not monitor
E124	2008-01-09	5	585225	265933	Semampek	N	Grass roadside	9	74	Fresh	0	2008-01-09	FOUND		2008-02-26	50	FOUND		2008-03-22	74
E125	2008-01-09	4	585225	265933	Semampek	N	Scrub roadside	30	74	Fresh	0	2008-01-09	FOUND		2008-02-26	49	FOUND		2008-03-22	74
E126	2008-01-09	5	585225	265933	Semampek	N	Shrub roadside	20	74	Fresh	0	2008-01-09	FOUND		2008-02-26	49	FOUND		2008-03-22	74
E127	2008-01-09	6	585225	265933	Semampek	N	Secondary forest	26	74	Fresh	0	2008-01-09	FOUND		2008-02-26	49	FOUND		2008-03-22	74
E128	2008-01-09	4	585210	266003	Pohon Derian	N	Scrub roadside	5	91	Fresh	0	2008-01-09	FOUND		2008-02-24	47	FOUND		2008-03-22	74
E129	2008-01-09	6	585206	266215	Pohon Derian	N	Scrub roadside	6	72	Fresh	0	2008-01-09	FOUND		2008-02-24	47	FOUND		2008-03-22	74
E130	2008-01-07	3	585931 (2D)	265243	Kg. Selai Lama	N	Secondary forest	2	NA	Fresh	0	2008-01-07	FOUND		2008-02-24	49	FOUND		2008-03-23	77
E131	2008-01-07	7	NA	NA	Kg. Selai Lama	N	Secondary forest	6	NA	Fresh	0	2008-01-07	FOUND		2008-02-24	49	FOUND		2008-03-23	77
E132	2008-01-09	7	NA	NA	Kg. Selai Lama	N	Secondary forest	1	NA	Fresh	0	2008-01-09	FOUND		2008-02-24	47	LOST		2008-03-23	77
E133	2008-01-10	6	NA	NA	Usung (road side)	N	Secondary forest	0	NA	Fresh	0	2008-01-10	FOUND		2008-02-24	46	FOUND		2008-03-21	72
E134	2008-01-10	4	585265	264602	Usung	N	Secondary forest	10	65	Fresh	0	2008-01-10	FOUND		2008-02-24	46	FOUND		2008-03-21	72
E135	2008-01-10	7	585150	264420	Old farm of Tok Batin	N	Secondary forest	0	70	Fresh	0	2008-01-10	LOST		2008-01-23	22
E136	2008-01-09	5 to 6	585168	266396	Segerek	N	Secondary forest	8	88	Fresh	0	2008-01-09	FOUND		2008-02-26	49	FOUND		2008-03-21	73
E137	2008-01-09	3	585136	266454	Sg. Segerek	N	Scrub roadside	2	68	Fresh	0	2008-01-09	FOUND		2008-02-26	49	FOUND		2008-03-22	74
E138	2008-01-09	6 to 7	585136	266454	Sg. Segerek	N	Secondary forest	24	68	Fresh	0	2008-01-09	FOUND		2008-02-26	49	FOUND		2008-03-22	74
E139	2008-01-09	3	585107	266518	Sg. Segerek	N	Shrub roadside	4	63	Fresh	0	2008-01-09	FOUND		2008-02-26	49	FOUND		2008-03-21	73
E140	2008-01-09	5	585098	266565	Sg. Segerek	N	Secondary forest	26	65	Fresh	0	2008-01-09	FOUND		2008-02-26	49	FOUND		2008-03-21	73
E141	2008-01-09	5	585063	266599	Kuari Batu,Sg.Segerek	N	Secondary forest	10	50	Fresh	0	2008-01-09	FOUND		2008-02-26	49	FOUND		2008-03-21	73
E142	2008-01-09	4	585066	266658	Kuari Batu	N	Secondary forest	24	68	Fresh	0	2008-01-09	FOUND		2008-02-26	49	FOUND		2008-03-21	73
E143	2008-01-09	4	585066	266658	Kuari Batu	N	Shrub roadside	30	68	Fresh	0	2008-01-09	FOUND		2008-02-26	49	FOUND		2008-03-21	73
E144	2008-01-09	8 to 9	585066	266658	Kuari Batu	N	Shrub roadside	16	68	Fresh	0	2008-01-09	FOUND		2008-02-26	49	FOUND		2008-03-21	73
E145	2008-01-09	15	585066	266658	Kuari Batu	N	Secondary forest	12	68	Fresh	0	2008-01-09	FOUND		2008-02-26	49	FOUND		2008-03-21	73
E146	2008-01-09	4	585066	266658	Kuari Batu	N	Secondary forest	19	68	Fresh	0	2008-01-09	FOUND		2008-02-26	49	FOUND		2008-03-21	73
E147	2008-01-09	8 to 10	585066	266658	Kuari Batu	N	Secondary forest	20	68	Fresh	0	2008-01-09	FOUND		2008-02-26	49	FOUND		2008-03-22	74
E148	2008-01-09	7	585067	266754	Sg. Kelemboi	N	Secondary forest	12	58	Fresh	0	2008-01-09	FOUND		2008-02-26	49	FOUND		2008-03-21	73
E149	2008-01-09	6	584948	266987	Sg. Kelemboi	N	Secondary forest	4	58	Fresh	0	2008-01-09	FOUND		2008-02-26	49	FOUND		2008-03-21	73
E150	2008-01-09	8	584929	267012	Sg. Kelemboi	N	Grass roadside	6	76	Fresh	0	2008-01-09	FOUND		2008-02-26	49	FOUND		2008-03-21	73
E151	2008-01-09	7	584634	267537	Sg. Kelemboi	N	Scrub roadside	8	59	Fresh	0	2008-01-09	FOUND		2008-02-26	49	FOUND		2008-03-21	73
E152	2008-01-09	6	584634	267537	Sg. Kelemboi	N	Secondary forest	40	59	Fresh	0	2008-01-09	FOUND		2008-02-26	49	FOUND		2008-03-21	73
E153	2008-01-09	7	584629	267622	Sg. Kelemboi	N	Scrub roadside	2	101	Fresh	0	2008-01-09	FOUND		2008-02-26	49	FOUND		2008-03-21	73
E154	2008-01-09	5	584615	267616	Ulu Paya Kelemboi	N	Scrub roadside	8	90	Fresh	0	2008-01-09	FOUND		2008-02-26	49	FOUND		2008-03-21	73
E155	2008-01-09	5	584554	267789	Pokok Mersawa Besar	N	Scrub roadside	17	89	Fresh	0	2008-01-09	FOUND		2008-02-26	49	FOUND		2008-03-21	73
E156	2008-01-09	8	584539	267999	Pokok Mersawa Besar	N	Scrub roadside	4	96	Fresh	0	2008-01-09	FOUND		2008-02-26	49	FOUND		2008-03-21	73
E157	2008-01-09	8	584526	268084	Pokok Mersawa Besar	N	Shrub roadside	14	76	Fresh	0	2008-01-09	FOUND		2008-02-26	49	FOUND		2008-03-21	73
E158	2008-01-09	4	584480	268238	Jambatan Sg. Batu	N	Scrub roadside	16	66	Fresh	0	2008-01-09	FOUND		2008-02-26	49	FOUND		2008-03-21	73
E159	2008-01-09	5	584459	268272	Jambatan Sg. Batu	N	Scrub roadside	14	107	Fresh	0	2008-01-09	FOUND		2008-02-26	49	FOUND		2008-03-21	73
E160	2008-01-09	9	584458	268430	Jambatan Sg. Batu	N	Secondary forest	4	103	Fresh	0	2008-01-09	FOUND		2008-02-26	49	FOUND		2008-03-21	73
E161	2008-01-09	6	584381	268647	Jln. Sg. Tengkeboh	N	Scrub roadside	18	85	Fresh	0	2008-01-09	FOUND		2008-02-26	49	FOUND		2008-03-21	73
E162	2008-01-09	6	584381	268647	Jln. Sg. Tengkeboh	N	Scrub roadside	4	85	Fresh	0	2008-01-09	FOUND		2008-02-26	49	FOUND		2008-03-21	73
E163	2008-01-09	9	584381	268647	Jln. Sg. Tengkeboh	N	Scrub roadside	4	85	Fresh	0	2008-01-09	FOUND		2008-02-26	49	FOUND		2008-03-21	73
E164	2008-01-09	5	584381	268647	Jln. Sg. Tengkeboh	N	Scrub roadside	8	85	Fresh	0	2008-01-09	FOUND		2008-02-26	49	FOUND		2008-03-21	73
E165	2008-01-09	7	584359	268799	Lubuk Merekek	N	Scrub roadside	10	84	Fresh	0	2008-01-09	FOUND		2008-02-26	49	FOUND		2008-03-21	73
E166	2008-01-09	9	584359	268799	Lubuk Merekek	N	Secondary forest	2	10	Fresh	0	2008-01-09	FOUND		2008-02-26	49	FOUND		2008-03-22	74
E167	2008-02-22	5	584960	261808	Kuala Kemidak	N	Secondary forest	12	58	Fresh	0	2008-02-22	FOUND		2008-03-22	30
E168	2008-02-22	7	585607	261257	Kuala Kemidak	N	Secondary forest	4	119	Fresh	0	2008-02-22	FOUND		2008-03-22	30
E169	2008-02-22	5 to 6	586478	261559	Kuala Kemidak	N	Secondary forest	6	76	Fresh	0	2008-02-22	FOUND		2008-03-22	30
E170	2008-02-23	4	585458	265174	Sg. Pencah Burung Mandi/ Sg. Semampek	N	Secondary forest	4	101	Fresh	0	2008-02-23	FOUND		2008-03-23	30
E171	2008-02-23	6	585407	265193	Sg. Pencah Burung Mandi/ Sg. Semampek	N	Secondary forest	20	97	Fresh	0	2008-02-23	FOUND		2008-03-23	30
E172	2008-02-23	6 to 7	585407	265193	Sg. Pencah Burung Mandi/ Sg. Semampek	N	Secondary forest	8	97	Fresh	0	2008-02-23	FOUND		2008-03-23	30
E173	2008-02-23	6	NA	NA	Sg. Pencah Burung Mandi/ Sg. Semampek	N	Secondary forest	4	NA	Fresh	0	2008-02-23	FOUND		2008-03-23	30
E174	2008-02-23	7	585347 (2D)	265151	Kaki Bkt Kleman	N	Secondary forest	10	NA	Fresh	0	2008-02-23	FOUND		2008-03-21	28
E175	2008-02-23	8	NA	NA	Bkt Kleman	N	Secondary hill forest	16	NA	Fresh	0	2008-02-23	FOUND		2008-03-23	30
E176	2008-02-23	6 to 7	NA	NA	Bkt Kleman	N	Secondary hill forest	30	NA	Fresh	0	2008-02-23	FOUND		2008-03-23	30
E177	2008-02-23	6	585348 (2D)	265152	Bkt Kleman	N	Secondary hill forest	50	NA	Fresh	0	2008-02-23	FOUND		2008-03-23	30
E178	2008-02-23	5 to 6	NA	NA	Bkt Kleman	N	Secondary hill forest	22	NA	Fresh	0	2008-02-23	FOUND		2008-03-23	30
E179	2008-02-23	3	NA	NA	Bkt Kleman	N	Secondary hill forest	20	NA	Fresh	0	2008-02-23	FOUND		2008-03-23	30
E180	2008-02-23	7	585348 (2D)	265152	Bkt Kleman	N	Secondary hill forest	4	NA	Fresh	0	2008-02-23	FOUND		2008-03-23	30
E181	2008-02-29	4	585376	265150	Usung	N	Grass roadside	30	81	Fresh	0	2008-02-29
E182	2008-02-29	5	585363	265145	Usung	N	Grass roadside	12	79	Fresh	0	2008-02-29
E183	2008-02-29	5	585420	265058	Usung		Secondary forest	4	76	Fresh	0	2008-02-29
E184	2008-02-29	5	585416	265054	Usung		Secondary forest	10	85	Fresh	0	2008-02-29
E185	2008-02-29	6	585416	265054	Usung		Secondary forest	8		Fresh	0	2008-02-29
E186	2008-02-29	5	585413	265126	Usung	Y	Primary forest	20	153	Fresh	0	2008-02-29
E187	2008-02-29	5	585410	265308	Usung	Y	Primary forest	8	67	Fresh	0	2008-02-29
E188	2008-02-29	3	585509	265547	Semampek	Y	Primary forest	0	107	Fresh	0	2008-02-29
E189	2008-02-29	3	585509	265547	Semampek	N	Primary forest	2	107	Fresh	0	2008-02-29
E190	2008-02-29	5	585584	265542	Semampek	Y	Primary forest	2	67	Fresh	0	2008-02-29
E191	2008-02-29	5	585417	265470	Semampek	N	Scrub	2	108	Fresh	0	2008-02-29
E192	2008-02-29	7	585346	265242	Usung	T	Secondary forest	18	74	Fresh	0	2008-02-29
E193	2008-02-29	4	585343	265220	Usung	Y	Primary forest	30		Fresh	0	2008-02-29
E194	2008-02-29	5	585343	265220	Usung	Y	Primary forest	12		Fresh	0	2008-02-29
E195	2008-02-29		585372	265203	Usung	Y	Primary forest	12	69	Fresh	0	2008-02-29
E196	2008-02-29	8	585372	265203	Usung	Y	Primary forest	6	69	Fresh	0	2008-02-29
E197	2008-02-29	5	585372	265203	Usung	Y	Primary forest	10	69	Fresh	0	2008-02-29
E198	2008-02-29	4	585371	265223	Usung		Primary forest	12	73	Fresh	0	2008-02-29
E199	2008-02-29	4	585371	265223	Usung		Primary forest	32	73	Fresh	0	2008-02-29
E200	2008-02-29		585371	265223	Usung		Primary forest	22	73	Fresh	0	2008-02-29
E201	2008-02-29	5	585371	265223	Usung		Primary forest	34	73	Fresh	0	2008-02-29
E202	2008-02-29	5	585322	265226	Usung		Primary forest	6	87	Fresh	0	2008-02-29
E203	2008-02-29	5	585322	265226	Usung		Primary forest	24	87	Fresh	0	2008-02-29
E204	2008-02-29	4	585343	265220	Usung	Y	Primary forest	30		Fresh	0	2008-02-29
E205	2008-02-29	5	585333	265180	Usung	N	Secondary forest	16	105	Fresh	0	2008-02-29
E206	2008-02-29	4	585359	265172	Usung	N	Grass roadside	16	90	Fresh	0	2008-02-29
E207	2008-03-19	8-9	585102	266634	Sg Segerik	N	Secondary forest	6	82	Fresh	0	2008-03-19
E208	2008-03-19	N	585089	266648	Sg Segerik	Y	Dry riverbed	8	86	Fresh	0	2008-03-19
E209	2008-03-25	6	585472	264885	Usung (near park gate)	Y	Secondary forest	16	51	Fresh	0	2008-03-25
E210	2008-03-25	5	585489	264905	Usung (near park gate)	Y	Secondary forest	10	49	Fresh	0	2008-03-25
E211	2008-03-25	3	585493	264896	Usung (near park gate)	Y	Secondary forest	4	66	Fresh	0	2008-03-25
E212	2008-03-25	4	585504	264902	Usung (near park gate)	Y	Secondary forest	4	66	Fresh	0	2008-03-25
E213	2008-03-25	8	585504	264902	Usung (near park gate)	Y	Secondary forest	0	66	Fresh	0	2008-03-25
E214	2008-03-25	6	585505	264888	Usung (near park gate)	Y	Secondary forest	2	20	Fresh	0	2008-03-25
E215	2008-03-25	4	585534	264886	Usung (near park gate)	Y	Secondary forest	2	40	Fresh	0	2008-03-25
E216	2008-03-25	5	585543	264886	Usung (near park gate)	Y	Secondary forest	2	63	Fresh	0	2008-03-25
E217	2008-03-25	8	585353	264808	Usung (near durian tree)	Y	Scrub roadside	22	67	Fresh	0	2008-03-25
E218	2008-03-25	5	585353	264808	Usung (near durian tree)	Y	Grass roadside	6	67	Fresh	0	2008-03-25
								Amended based on field observation by Aris Oziar
								Note that definition is by no means clear because roadside scrub / shrub / grass still has open canopy cover overhead, but redesignated because there is a clear difference in undergrowth vegetation type between roadside vs inside the jungle
								Amended based on what's written by Cynthia Boon in her handwritten datasheet

## Sheet: Summary
Notes:
NA= not available (e.g.: GPS reading)
LOST = Use this if the dung cannot be found anymore because it was gone due to flood, and other natural phenomena (please add comments why it was lost!!!)
DID NOT MONITOR = Use this if you did not monitor the dung pile. Please justify why you didn't monitor.
Use only S1, S2, S3, S4, S5 for classification.
LABEL		LOCATION	ON TRAIL?	SLOPE	ALTITUDE	VEGETATION	STATE	DAYS		PIVOT TABLE SUMMARY SELAI DUNG
E001	2007-09-05	Pohon Derian	N	19	91	Secondary forest	BULLDOZED			Count of STATE
E002	2007-09-05	Pohon Derian	Y	2	109	Secondary forest	S5	276		STATE	Total
E003	2007-09-05	Pohon Derian	Y	4	69	Secondary forest	S3	279		BULLDOZED	8	0.0366972
E004	2007-09-06	Pohon Derian	Y	11	63	Secondary forest	S3	278		BURNT	11	0.0504587
E005	2007-09-06	Pohon Derian	Y	4	63	Secondary forest	S3	278		CLEARED	2	0.00917431
E006	2007-09-06	Pohon Derian	Y	3	63	Secondary forest	S3	278		NO INFO	3	0.0137615
E007	2007-09-06	Pohon Derian	N	17	93	Secondary forest	S3	278		NOT FOUND	18	0.0825688
E008	2007-09-06	Pohon Derian	N	4	93	Secondary forest	S5	278		S3	146	0.669725
E009	2007-09-06	Pohon Derian	N	8	63	Secondary forest	S4	278		S4	8	0.0366972
E010	2007-09-06	Pohon Derian	N	8	63	Secondary forest	S4	278		S5	22	0.100917
E011	2007-09-06	Pohon Derian	N	2	63	Secondary forest	S3	278		Grand Total	218	1
E012	2007-09-06	Pohon Derian	N	3	63	Secondary forest	S4	278
E013	2007-09-06	Pohon Derian	N	10	58	Secondary forest	S3	278		PIVOT TABLE SUMMARY SELAI DUNG
E014	2007-09-06	Pohon Derian	N	4	58	Secondary forest	S5	278		Count of STATE	STATE
E015	2007-09-06	Pohon Derian	N	6	58	Secondary forest	S3	278		VEGETATION	BULLDOZED	BURNT	CLEARED	NO INFO	NOT FOUND	S3	S4	S5	Grand Total
E016	2007-09-06	Pohon Derian	N	0	58	Secondary forest	S3	278		Dry riverbed						1			1
E017	2007-09-06	Pohon Derian	N	2	58	Secondary forest	S4	278		Grass roadside	1					6			7
E018	2007-09-06	Pohon Derian	N	13	58	Secondary forest	S3	278		Grassland		2							2
E019	2007-09-06	Pohon Derian	N	2	30	Secondary forest	S3	278		NA				3					3
E020	2007-09-06	Pohon Derian	N	10	30	Secondary forest	S3	278		Primary forest					3	14			17
E021	2007-09-06	Pohon Derian	N	10	84	Secondary forest	S4	278		rubber plantation		1				1		1	3
E022	2007-09-06	Pohon Derian	N	0	85	Secondary forest	S3	278		Scrub		7			2	8		1	18
E023	2007-09-06	Pohon Derian	N	8	85	Secondary forest	S5	278		Scrub roadside	1					16			17
E024	2007-09-06	Pohon Derian	N	2	51	Secondary forest	S3	278		Secondary forest	6	1	2		13	89	8	20	139
E025	2007-09-06	Pohon Derian	N	3	82	Secondary forest	S3	278		Secondary hill forest						6			6
E026	2007-09-06	Pohon Derian	N	16	82	Secondary forest	S5	278		Shrub roadside						5			5
E027	2007-09-06	Pohon Derian	N	2	74	Secondary forest	S3	278		Grand Total	8	11	2	3	18	146	8	22	218
E028	2007-09-06	Pohon Derian	N	3	67	Secondary forest	S3	278
E029	2007-09-06	Pohon Derian	N	2	67	Secondary forest	S3	278		Note "Primary Forest", "Secondary Forest" & "Secondary Hill Forest" can be lumped together for analysis
E030	2007-09-06	Pohon Derian	N	2	67	Secondary forest	S3	278
E031	2007-09-06	Pohon Derian	N	2	67	Secondary forest	S3	278
E032	2007-09-06	Pohon Derian	N	18	67	Secondary forest	S3	278
E033	2007-09-06	Pohon Derian	N	8	82	Secondary forest	S5	278
E034	2007-09-06	Pohon Derian	N	4	82	Secondary forest	S3	278
E035	2007-09-06	Pohon Derian	N	0	82	Secondary forest	S3	278
E036	2007-09-06	Pohon Derian	N	4	82	Secondary forest	S5	278
E037	2007-09-10	Kg. Selai Lama	N	6	69	Scrub	NOT FOUND
E038	2007-09-10	Kg. Selai Lama	N	9	73	rubber plantation	S5	275
E039	2007-09-10	Kg. Selai Lama	N	20	87	rubber plantation	BURNT
E040	2007-09-10	Kg. Selai Lama	N	30	87	Scrub	BURNT
E041	2007-09-11	Kg. Selai Lama	N	6	58	Scrub	S5	274
E042	2007-09-11	Kg. Selai Lama	N	4	55	Scrub	S3	274
E043	2007-09-11	Kg. Selai Lama	N	2	54	Scrub	S3	274
E044	2007-09-11	Kg. Selai Lama	N	20	54	Scrub	S3	274
E045	2007-09-11	Kg. Selai Lama	N	0	54	Scrub	S3	274
E046	2007-09-11	Kg. Selai Lama	N	8	47	Scrub	S3	274
E047	2007-09-11	Usung	N	24	49	Scrub	BURNT
E048	2007-09-11	Usung	N	32	50	Scrub	BURNT
E049	2007-09-11	Usung	N	30	51	Scrub	BURNT
E050	2007-09-11	Usung	N	15	56	Scrub	BURNT
E051	2007-09-11	Usung	N	7	56	Scrub	BURNT
E052	2007-09-11	Usung	N	48	48	Scrub	BURNT
E053	2007-09-11	Usung	N	64	64	Grassland	BURNT
E054	2007-09-12	Usung	N	53	53	Grassland	BURNT
E055	2007-09-13	Kg. Selai Lama	Y	15	62	Scrub	S3	272
E056	2007-09-13	Kg. Selai Lama	Y	3	60	Rubber plantation	S3	272
E057	2007-09-14	Kg. Selai Lama	N	3	60	Scrub	S3	271
E058	2007-09-14	Kg. Selai Lama	N	13	47	Secondary forest	S5	271
E059	2007-10-10	Semampek	N	9	59	Secondary forest	S5	246
E060	2007-10-10	Semampek	N	8	NA	Secondary forest	S3	246
E061	2007-10-11	Semampek	N	4	65	Secondary forest	S5	245
E062	2007-10-11	Pohon Derian	N	3	64	Secondary forest	S5	245
E063	2007-10-10	Pohon Derian	N	2	60	Secondary forest	S5	246
E064	2007-10-10	Pohon Derian	N	5	61	Secondary forest	S5	246
E065	2007-10-11	Pohon Derian	N	6	84	Secondary forest	S3	243
E066	2007-10-11	Pohon Derian	N	5	62	Secondary forest	S3	245
E067	2007-10-11	Pohon Derian	N	4	56	Secondary forest	S3	245
E068	2007-10-11	Pohon Derian	N	3	71	Secondary forest	S3	245
E069	2007-10-11	Pohon Derian	N	2	68	Secondary forest	S3	245
E070	2007-10-10	Pohon Derian	N	6	66	Secondary forest	S3	246
E071	2007-10-11	Pohon Derian	N	4	67	Secondary forest	S3	245
E072	2007-10-11	Pohon Derian	N	4	67	Secondary forest	S3	245
E073	2007-10-11	Pohon Derian	N	8	68	Secondary forest	S3	244
E074	2007-10-10	Pohon Derian	N	7	59	Secondary forest	NOT FOUND
E075	2007-10-10	Pohon Derian	N	6	70	Secondary forest	S3	245
E076	2007-10-11	Pohon Derian	N	2	57	Secondary forest	S3	244
E077	2007-10-10	Semampek	N	4	62	Secondary forest	S3	245
E078	2007-10-10	Semampek	N	3	59	Secondary forest	S3	245
E079	2007-10-10	Semampek	N	6	54	Secondary forest	S3	245
E080	2007-10-10	Semampek	N	5	54	Secondary forest	S3	245
E081	2007-10-11	Jalan Balak Kemedak	Y	12	72	Secondary forest	S3	245
E082	2007-10-11	Jalan Balak Kemedak	Y	12	84	Secondary forest	S3	245
E083	2007-10-11	Jalan Balak Kemedak	Y	1	78	Secondary forest	S3	245
E084	2007-10-11	Jalan Balak Kemedak	Y	11	113	Secondary forest	S3	245
E085	2007-10-11	Jalan Balak Kemedak	Y	5	94	Secondary forest	S3	245
E086	2007-10-10	Semampek	N	23	55	Secondary forest	S5	245
E087	2007-10-10	Semampek	N	11	61	Secondary forest	S5	245
E088	2007-10-11	Semampek	N	18	46	Secondary forest	S3	244
E089	2007-10-11	Semampek	N	4	46	Secondary forest	S3	244
E090	2007-10-11	Semampek	N	4	55	Secondary forest	S3	244
E091	2007-10-11	Semampek	N	11	52	Secondary forest	S3	244
E092	2007-11-01	Semampek	Y	6	NA	Secondary forest	NOT FOUND
E093	2007-11-01	Semampek	Y	16	NA	Secondary forest	NOT FOUND
E094	2007-11-01	Semampek	Y	7	96	Secondary forest	NOT FOUND
E095	2007-11-01	Semampek	Y	18	87	Secondary forest	NOT FOUND
E096	2007-11-01	Semampek	Y	23	84	Secondary forest	NOT FOUND
E097	2007-11-03	Bkt Kleman	Y	NA	NA	Grass roadside	S3	219
E098	2007-11-03	Sg. Manik	N	NA	NA	Secondary Forest	S3	220
E099	2007-11-03	Semampek	N	NA	NA	Secondary Forest	S3	220
E100	2007-11-03	Bkt Kleman	N	NA	NA	Secondary Forest	S5	220
E101	2007-11-03	Bkt Kleman	N	NA	NA	Secondary Forest	S3	220
E102	2007-11-03	Bkt Kleman	N	NA	NA	Secondary Forest	S5	220
E103	2007-11-03	Bkt Kleman	N	NA	NA	Secondary Forest	S4	220
E104	2007-11-03	Bkt Kleman	NA	NA	NA	NA	NO INFO
E105	2007-11-03	Bkt Kleman	NA	NA	NA	NA	NO INFO
E106	2007-11-03	Bkt Kleman	NA	NA	NA	NA	NO INFO
E107	2007-11-23	Sg. Semampek	N	12	74	Secondary forest	S5	199
E108	2007-11-23	Sg. Semampek	N	7	74	Secondary forest	S3	198
E109	2007-11-23	Sg. Semampek	N	4	74	Secondary forest	S5	197
E110	2007-11-27	Jln. Balak Kuala Kemidak	N	4	88	Secondary forest	S3	198
E111	2007-11-27	Jln. Balak Kuala Kemidak	N	2	89	Secondary forest	S3	198
E112	2007-11-27	Jln. Balak Kuala Kemidak	N	2	78	Secondary forest	NOT FOUND
E113	2007-11-27	Jln. Balak Kuala Kemidak	N	4	93	Secondary forest	NOT FOUND
E114	2007-11-27	Jln. Balak Kuala Kemidak	N	8	60	Secondary forest	NOT FOUND
E115	2007-11-25	Kg. Selai Lama	N	2	58	Scrub	S3	199
E116	2007-12-03	Sg. Semampek	N	4	53	Secondary forest	S3	189
E117	2007-12-03	Sg. Pencah Burung Mandi/ Sg. Semampek	Y	8	73	Secondary forest	NOT FOUND
E118	2007-12-03	Bkt Kelemboi	N	8	113	Secondary forest	BULLDOZED
E119	2007-12-03	Sg. Semampek	N	3	53	Secondary forest	S3	191
E120	2007-12-03	Kebun/ Sg. Semampek	N	6	NA	Secondary forest	S4	191
E121	2007-12-03	Ibu Sg. Semampek	N	6	68	Secondary forest	S3	191
E122	2007-12-27	Ulu Kemedak	N	22	87	Secondary forest	S3	168
E123	2007-12-27	Ulu Kemedak	N	4	83	Secondary forest	S3	168
E124	2008-01-09	Semampek	N	9	74	Grass roadside	S3	152
E125	2008-01-09	Semampek	N	30	74	Scrub roadside	S3	152
E126	2008-01-09	Semampek	N	20	74	Shrub roadside	S3	152
E127	2008-01-09	Semampek	N	26	74	Secondary forest	S3	152
E128	2008-01-09	Pohon Derian	N	5	91	Scrub roadside	BULLDOZED
E129	2008-01-09	Pohon Derian	N	6	72	Scrub roadside	S3	152
E130	2008-01-07	Kg. Selai Lama	N	2	NA	Secondary forest	S4	156
E131	2008-01-07	Kg. Selai Lama	N	6	NA	Secondary forest	S3	156
E132	2008-01-09	Kg. Selai Lama	N	1	NA	Secondary forest	BURNT
E133	2008-01-10	Usung (road side)	N	0	NA	Secondary forest	NOT FOUND
E134	2008-01-10	Usung	N	10	65	Secondary forest	S3	151
E135	2008-01-10	Old farm of Tok Batin	N	0	70	Secondary forest	S5	151
E136	2008-01-09	Segerek	N	8	88	Secondary forest	BULLDOZED
E137	2008-01-09	Sg. Segerek	N	2	68	Scrub roadside	S3	152
E138	2008-01-09	Sg. Segerek	N	24	68	Secondary forest	S3	152
E139	2008-01-09	Sg. Segerek	N	4	63	Shrub roadside	S3	152
E140	2008-01-09	Sg. Segerek	N	26	65	Secondary forest	S3	152
E141	2008-01-09	Kuari Batu,Sg.Segerek	N	10	50	Secondary forest	BULLDOZED
E142	2008-01-09	Kuari Batu	N	24	68	Secondary forest	NOT FOUND
E143	2008-01-09	Kuari Batu	N	30	68	Shrub roadside	S3	152
E144	2008-01-09	Kuari Batu	N	16	68	Shrub roadside	S3	152
E145	2008-01-09	Kuari Batu	N	12	68	Secondary forest	S3	152
E146	2008-01-09	Kuari Batu	N	19	68	Secondary forest	S3	152
E147	2008-01-09	Kuari Batu	N	20	68	Secondary forest	S3	152
E148	2008-01-09	Sg. Kelemboi	N	12	58	Secondary forest	S3	152
E149	2008-01-09	Sg. Kelemboi	N	4	58	Secondary forest	BULLDOZED
E150	2008-01-09	Sg. Kelemboi	N	6	76	Grass roadside	S3	152
E151	2008-01-09	Sg. Kelemboi	N	8	59	Scrub roadside	S3	152
E152	2008-01-09	Sg. Kelemboi	N	40	59	Secondary forest	S3	152
E153	2008-01-09	Sg. Kelemboi	N	2	101	Scrub roadside	S3	152
E154	2008-01-09	Ulu Paya Kelemboi	N	8	90	Scrub roadside	S3	152
E155	2008-01-09	Pokok Mersawa Besar	N	17	89	Scrub roadside	S3	152
E156	2008-01-09	Pokok Mersawa Besar	N	4	96	Scrub roadside	S3	152
E157	2008-01-09	Pokok Mersawa Besar	N	14	76	Shrub roadside	S3	152
E158	2008-01-09	Jambatan Sg. Batu	N	16	66	Scrub roadside	S3	152
E159	2008-01-09	Jambatan Sg. Batu	N	14	107	Scrub roadside	S3	152
E160	2008-01-09	Jambatan Sg. Batu	N	4	103	Secondary forest	BULLDOZED
E161	2008-01-09	Jln. Sg. Tengkeboh	N	18	85	Scrub roadside	S3	152
E162	2008-01-09	Jln. Sg. Tengkeboh	N	4	85	Scrub roadside	S3	152
E163	2008-01-09	Jln. Sg. Tengkeboh	N	4	85	Scrub roadside	S3	152
E164	2008-01-09	Jln. Sg. Tengkeboh	N	8	85	Scrub roadside	S3	152
E165	2008-01-09	Lubuk Merekek	N	10	84	Scrub roadside	S3	152
E166	2008-01-09	Lubuk Merekek	N	2	10	Secondary forest	S3	152
E167	2008-02-22	Kuala Kemidak	N	12	58	Secondary forest	NOT FOUND
E168	2008-02-22	Kuala Kemidak	N	4	119	Secondary forest	S3	111
E169	2008-02-22	Kuala Kemidak	N	6	76	Secondary forest	S3	111
E170	2008-02-23	Sg. Pencah Burung Mandi/ Sg. Semampek	N	4	101	Secondary forest	S3	108
E171	2008-02-23	Sg. Pencah Burung Mandi/ Sg. Semampek	N	20	97	Secondary forest	S3	108
E172	2008-02-23	Sg. Pencah Burung Mandi/ Sg. Semampek	N	8	97	Secondary forest	S3	108
E173	2008-02-23	Sg. Pencah Burung Mandi/ Sg. Semampek	N	4	NA	Secondary forest	S3	108
E174	2008-02-23	Kaki Bkt Kleman	N	10	NA	Secondary forest	S3	107
E175	2008-02-23	Bkt Kleman	N	16	NA	Secondary hill forest	S3	110
E176	2008-02-23	Bkt Kleman	N	30	NA	Secondary hill forest	S3	110
E177	2008-02-23	Bkt Kleman	N	50	NA	Secondary hill forest	S3	110
E178	2008-02-23	Bkt Kleman	N	22	NA	Secondary hill forest	S3	110
E179	2008-02-23	Bkt Kleman	N	20	NA	Secondary hill forest	S3	110
E180	2008-02-23	Bkt Kleman	N	4	NA	Secondary hill forest	S3	110
E181	2008-02-29	Usung	N	30	81	Grass roadside	BULLDOZED
E182	2008-02-29	Usung	N	12	79	Grass roadside	S3	101
E183	2008-02-29	Usung		4	76	Secondary forest	S3	102
E184	2008-02-29	Usung		10	85	Secondary forest	S3	102
E185	2008-02-29	Usung		8		Secondary forest	S3	102
E186	2008-02-29	Usung	Y	20	153	Primary forest	S3	102
E187	2008-02-29	Usung	Y	8	67	Primary forest	S3	102
E188	2008-02-29	Semampek	Y	0	107	Primary forest	NOT FOUND
E189	2008-02-29	Semampek	N	2	107	Primary forest	NOT FOUND
E190	2008-02-29	Semampek	Y	2	67	Primary forest	NOT FOUND
E191	2008-02-29	Semampek	N	2	108	Scrub	NOT FOUND
E192	2008-02-29	Usung	T	18	74	Secondary forest	S3	102
E193	2008-02-29	Usung	Y	30		Primary forest	S3	102
E194	2008-02-29	Usung	Y	12		Primary forest	S3	102
E195	2008-02-29	Usung	Y	12	69	Primary forest	S3	102
E196	2008-02-29	Usung	Y	6	69	Primary forest	S3	102
E197	2008-02-29	Usung	Y	10	69	Primary forest	S3	102
E198	2008-02-29	Usung		12	73	Primary forest	S3	102
E199	2008-02-29	Usung		32	73	Primary forest	S3	102
E200	2008-02-29	Usung		22	73	Primary forest	S3	102
E201	2008-02-29	Usung		34	73	Primary forest	S3	102
E202	2008-02-29	Usung		6	87	Primary forest	S3	102
E203	2008-02-29	Usung		24	87	Primary forest	S3	102
E204	2008-02-29	Usung	Y	30		Primary forest	S3	102
E205	2008-02-29	Usung	N	16	105	Secondary forest	S3	102
E206	2008-02-29	Usung	N	16	90	Grass roadside	S3	101
E207	2008-03-19	Sg Segerik	N	6	82	Secondary forest	S3	82
E208	2008-03-19	Sg Segerik	Y	8	86	Dry riverbed	S3	82
E209	2008-03-25	Usung (near park gate)	Y	16	51	Secondary forest	S3	78
E210	2008-03-25	Usung (near park gate)	Y	10	49	Secondary forest	S3	78
E211	2008-03-25	Usung (near park gate)	Y	4	66	Secondary forest	S3	78
E212	2008-03-25	Usung (near park gate)	Y	4	66	Secondary forest	S3	78
E213	2008-03-25	Usung (near park gate)	Y	0	66	Secondary forest	S3	78
E214	2008-03-25	Usung (near park gate)	Y	2	20	Secondary forest	S3	78
E215	2008-03-25	Usung (near park gate)	Y	2	40	Secondary forest	CLEARED
E216	2008-03-25	Usung (near park gate)	Y	2	63	Secondary forest	CLEARED
E217	2008-03-25	Usung (near durian tree)	Y	22	67	Scrub roadside	S3	76
E218	2008-03-25	Usung (near durian tree)	Y	6	67	Grass roadside	S3	76
	Amended based on field observation by Aris Oziar
	Note that definition is by no means clear because roadside scrub / shrub / grass still has open canopy cover overhead,
	but redesignated because there is a clear difference in undergrowth vegetation type between roadside vs inside the jungle
	Amended based on what's written by Cynthia Boon in her handwritten datasheet

## Sheet: R Format
FILTERING STEPS
1	Delete all those without classification because not found, bulldozed, etc. (highlighted yellow below)
2	END
DAYS	STATE
	BULLDOZED
	BULLDOZED
	BULLDOZED
	BULLDOZED
	BULLDOZED
	BULLDOZED
	BULLDOZED
	BULLDOZED
	BURNT
	BURNT
	BURNT
	BURNT
	BURNT
	BURNT
	BURNT
	BURNT
	BURNT
	BURNT
	BURNT
	CLEARED
	CLEARED
	NO INFO
	NO INFO
	NO INFO
	NOT FOUND
	NOT FOUND
	NOT FOUND
	NOT FOUND
	NOT FOUND
	NOT FOUND
	NOT FOUND
	NOT FOUND
	NOT FOUND
	NOT FOUND
	NOT FOUND
	NOT FOUND
	NOT FOUND
	NOT FOUND
	NOT FOUND
	NOT FOUND
	NOT FOUND
	NOT FOUND
279	S3
278	S3
278	S3
278	S3
278	S3
278	S3
278	S3
278	S3
278	S3
278	S3
278	S3
278	S3
278	S3
278	S3
278	S3
278	S3
278	S3
278	S3
278	S3
278	S3
278	S3
278	S3
278	S3
274	S3
274	S3
274	S3
274	S3
274	S3
272	S3
272	S3
271	S3
246	S3
243	S3
245	S3
245	S3
245	S3
245	S3
246	S3
245	S3
245	S3
244	S3
245	S3
244	S3
245	S3
245	S3
245	S3
245	S3
245	S3
245	S3
245	S3
245	S3
245	S3
244	S3
244	S3
244	S3
244	S3
219	S3
220	S3
220	S3
220	S3
198	S3
198	S3
198	S3
199	S3
189	S3
191	S3
191	S3
168	S3
168	S3
152	S3
152	S3
152	S3
152	S3
152	S3
156	S3
151	S3
152	S3
152	S3
152	S3
152	S3
152	S3
152	S3
152	S3
152	S3
152	S3
152	S3
152	S3
152	S3
152	S3
152	S3
152	S3
152	S3
152	S3
152	S3
152	S3
152	S3
152	S3
152	S3
152	S3
152	S3
152	S3
152	S3
111	S3
111	S3
108	S3
108	S3
108	S3
108	S3
107	S3
110	S3
110	S3
110	S3
110	S3
110	S3
110	S3
101	S3
102	S3
102	S3
102	S3
102	S3
102	S3
102	S3
102	S3
102	S3
102	S3
102	S3
102	S3
102	S3
102	S3
102	S3
102	S3
102	S3
102	S3
102	S3
102	S3
101	S3
82	S3
82	S3
78	S3
78	S3
78	S3
78	S3
78	S3
78	S3
76	S3
76	S3
278	S4
278	S4
278	S4
278	S4
278	S4
220	S4
191	S4
156	S4
276	S5
278	S5
278	S5
278	S5
278	S5
278	S5
278	S5
275	S5
274	S5
271	S5
246	S5
245	S5
245	S5
246	S5
246	S5
245	S5
245	S5
220	S5
220	S5
199	S5
197	S5
151	S5
