# Supplementary material for: Viability and management of the Asian elephant (Elephas maximus) population in the Endau Rompin landscape, Peninsular Malaysia
Source: PeerJ. 2020 Jan 24;8:e8209. doi: 10.7717/peerj.8209 (PMC6984340; doi:10.7717/peerj.8209)
Supplement: Table S1 [file peerj-08-8209-s001.xlsx]

## Sheet: xlNotes3dbSheet
xlNotes3dbSheet	0	#NAME?

## Sheet: S1 Table
Scenario name	det-r	stoc-r	SD(r)	PE	N-extant	SD(N-extant)	N-all	SD(N-all)	MedianTE	MeanTE
Baseline mortality rates; 3 different % females breeding (16%, 18%, & 20%)
FB16% + BaseMort + 0C + no removal + NoQ	0.003	0.002	0.025	0	174.02	38.02	174.02	38.02	0	0
FB16% + BaseMort + 0C + no removal + Q30	0.003	0.002	0.025	0	172.47	38.53	172.47	38.53	0	0
FB16% + BaseMort + 0C + no removal + Q50	0.003	0.002	0.025	0	175	38.33	175	38.33	0	0
FB16% + BaseMort + 2C + no removal + NoQ	0	0	0.031	0	139.21	38.83	139.21	38.83	0	0
FB16% + BaseMort + 2C + no removal + Q30	0	0	0.03	0	136.88	40.24	136.88	40.24	0	0
FB16% + BaseMort + 2C + no removal + Q50	0	0	0.03	0.002	144	39.27	143.79	39.52	0	71
FB16% + BaseMort + 0C + very low removal + NoQ	0.003	-0.041	0.076	0.852	12.38	11.33	2.07	6.19	83	81.2
FB16% + BaseMort + 0C + very low removal + Q30	0.003	-0.022	0.04	0.984	54.25	27.61	2.07	8.21	64	65.6
FB16% + BaseMort + 0C + very low removal + Q50	0.003	-0.017	0.034	0.998	91	0	2.03	6.85	55	55.9
FB16% + BaseMort + 2C + very low removal + NoQ	0	-0.045	0.081	0.948	10.23	7.98	0.63	2.9	77	77.1
FB16% + BaseMort + 2C + very low removal + Q30	0	-0.025	0.042	0.994	44	10.58	0.92	4.26	59	60.1
FB16% + BaseMort + 2C + very low removal + Q50	0	-0.02	0.037	1	0	0	0.71	2.98	49	49.4
FB16% + BaseMort + 0C + low removal + NoQ	0.003	-0.082	0.088	1	0	0	0	0	44	44.4
FB16% + BaseMort + 0C + low removal + Q30	0.003	-0.048	0.037	1	0	0	0	0	31	31.4
FB16% + BaseMort + 0C + low removal + Q50	0.003	-0.038	0.031	1	0	0	0	0	26	26
FB16% + BaseMort + 2C + low removal + NoQ	0	-0.086	0.093	1	0	0	0	0	43	42.8
FB16% + BaseMort + 2C + low removal + Q30	0	-0.05	0.04	1	0	0	0	0	30	30
FB16% + BaseMort + 2C + low removal + Q50	0	-0.041	0.034	1	0	0	0	0	25	24.5
FB16% + BaseMort + 0C + medium removal + NoQ	0.003	-0.1	0.138	1	0	0	0	0	37	36.5
FB16% + BaseMort + 0C + medium removal + Q30	0.003	-0.06	0.071	1	0	0	0	0	25	24.3
FB16% + BaseMort + 0C + medium removal + Q50	0.003	-0.05	0.059	1	0	0	0	0	19	19.5
FB16% + BaseMort + 2C + medium removal + NoQ	0	-0.102	0.14	1	0	0	0	0	36	36
FB16% + BaseMort + 2C + medium removal + Q30	0	-0.063	0.073	1	0	0	0	0	23	23.4
FB16% + BaseMort + 2C + medium removal + Q50	0	-0.053	0.061	1	0	0	0	0	19	18.4
FB16% + BaseMort + 0C + high removal + NoQ	0.003	-0.11	0.081	1	0	0	0	0	28	28.1
FB16% + BaseMort + 0C + high removal + Q30	0.003	-0.082	0.045	1	0	0	0	0	19	18.5
FB16% + BaseMort + 0C + high removal + Q50	0.003	-0.069	0.035	1	0	0	0	0	15	14.6
FB16% + BaseMort + 2C + high removal + NoQ	0	-0.112	0.082	1	0	0	0	0	28	27.4
FB16% + BaseMort + 2C + high removal + Q30	0	-0.084	0.047	1	0	0	0	0	18	18.2
FB16% + BaseMort + 2C + high removal + Q50	0	-0.071	0.038	1	0	0	0	0	14	14.3
FB18% + BaseMort + 0C + no removal + NoQ	0.006	0.006	0.025	0	218.24	28.94	218.24	28.94	0	0
FB18% + BaseMort + 0C + no removal + Q30	0.006	0.005	0.025	0	216.57	32.39	216.57	32.39	0	0
FB18% + BaseMort + 0C + no removal + Q50	0.006	0.006	0.025	0	220.48	28.04	220.48	28.04	0	0
FB18% + BaseMort + 2C + no removal + NoQ	0.004	0.003	0.03	0	186.7	42.4	186.7	42.4	0	0
FB18% + BaseMort + 2C + no removal + Q30	0.004	0.003	0.03	0	186.24	42.12	186.24	42.12	0	0
FB18% + BaseMort + 2C + no removal + Q50	0.004	0.003	0.03	0	186.65	43.28	186.65	43.28	0	0
FB18% + BaseMort + 0C + very low removal + NoQ	0.006	-0.032	0.067	0.638	27.24	25.53	10.27	20.02	93	85.4
FB18% + BaseMort + 0C + very low removal + Q30	0.006	-0.019	0.039	0.906	58.3	23.21	8.88	18.43	75	73
FB18% + BaseMort + 0C + very low removal + Q50	0.006	-0.015	0.034	0.932	66.62	12.76	9.01	18.08	63	63.2
FB18% + BaseMort + 2C + very low removal + NoQ	0.004	-0.039	0.076	0.804	20.72	18.2	4.35	11.46	85	81
FB18% + BaseMort + 2C + very low removal + Q30	0.004	-0.022	0.042	0.972	46.5	13.84	2.98	8.82	65	66
FB18% + BaseMort + 2C + very low removal + Q50	0.004	-0.017	0.037	0.976	61.08	12.29	3.93	11.61	55	56.6
FB18% + BaseMort + 0C + low removal + NoQ	0.006	-0.078	0.087	1	0	0	0	0	46	46.5
FB18% + BaseMort + 0C + low removal + Q30	0.006	-0.046	0.037	1	0	0	0	0	33	33
FB18% + BaseMort + 0C + low removal + Q50	0.006	-0.037	0.031	1	0	0	0	0	27	27
FB18% + BaseMort + 2C + low removal + NoQ	0.004	-0.082	0.09	1	0	0	0	0	45	44.6
FB18% + BaseMort + 2C + low removal + Q30	0.004	-0.048	0.04	1	0	0	0	0	31	31.5
FB18% + BaseMort + 2C + low removal + Q50	0.004	-0.038	0.034	1	0	0	0	0	25	25.9
FB18% + BaseMort + 0C + medium removal + NoQ	0.006	-0.097	0.138	1	0	0	0	0	37	37.7
FB18% + BaseMort + 0C + medium removal + Q30	0.006	-0.058	0.07	1	0	0	0	0	25	25.3
FB18% + BaseMort + 0C + medium removal + Q50	0.006	-0.048	0.059	1	0	0	0	0	20	20.2
FB18% + BaseMort + 2C + medium removal + NoQ	0.004	-0.099	0.137	1	0	0	0	0	37	36.8
FB18% + BaseMort + 2C + medium removal + Q30	0.004	-0.061	0.073	1	0	0	0	0	25	24.2
FB18% + BaseMort + 2C + medium removal + Q50	0.004	-0.05	0.06	1	0	0	0	0	19	19.3
FB18% + BaseMort + 0C + high removal + NoQ	0.006	-0.105	0.073	1	0	0	0	0	28	28.1
FB18% + BaseMort + 0C + high removal + Q30	0.006	-0.08	0.044	1	0	0	0	0	19	19.1
FB18% + BaseMort + 0C + high removal + Q50	0.006	-0.067	0.036	1	0	0	0	0	15	15.1
FB18% + BaseMort + 2C + high removal + NoQ	0.004	-0.111	0.082	1	0	0	0	0	28	27.9
FB18% + BaseMort + 2C + high removal + Q30	0.004	-0.082	0.046	1	0	0	0	0	19	18.6
FB18% + BaseMort + 2C + high removal + Q50	0.004	-0.068	0.038	1	0	0	0	0	15	14.7
FB20% + BaseMort + 0C + no removal + NoQ	0.009	0.009	0.024	0	238.21	15.08	238.21	15.08	0	0
FB20% + BaseMort + 0C + no removal + Q30	0.009	0.009	0.024	0	238.18	14.75	238.18	14.75	0	0
FB20% + BaseMort + 0C + no removal + Q50	0.009	0.008	0.024	0	237.83	14.96	237.83	14.96	0	0
FB20% + BaseMort + 2C + no removal + NoQ	0.007	0.006	0.029	0	220.54	30.05	220.54	30.05	0	0
FB20% + BaseMort + 2C + no removal + Q30	0.007	0.006	0.029	0	220.22	30.56	220.22	30.56	0	0
FB20% + BaseMort + 2C + no removal + Q50	0.007	0.006	0.029	0	220.55	28.67	220.55	28.67	0	0
FB20% + BaseMort + 0C + very low removal + NoQ	0.009	-0.023	0.056	0.366	44.75	40.37	28.65	38.51	0	86.4
FB20% + BaseMort + 0C + very low removal + Q30	0.009	-0.015	0.038	0.708	61.68	30.23	22.68	30.75	87	78.6
FB20% + BaseMort + 0C + very low removal + Q50	0.009	-0.011	0.034	0.778	83.06	28.96	26.86	35.18	77	71.7
FB20% + BaseMort + 2C + very low removal + NoQ	0.007	-0.032	0.069	0.612	34.41	32.36	13.63	26.08	95	83.5
FB20% + BaseMort + 2C + very low removal + Q30	0.007	-0.018	0.041	0.834	62	29.16	13.73	25.41	77	73
FB20% + BaseMort + 2C + very low removal + Q50	0.007	-0.014	0.037	0.928	74.47	19.25	10.44	20.87	65	63.9
FB20% + BaseMort + 0C + low removal + NoQ	0.009	-0.074	0.085	1	0	0	0	0	47	47.5
FB20% + BaseMort + 0C + low removal + Q30	0.009	-0.043	0.037	1	0	0	0	0	35	35.1
FB20% + BaseMort + 0C + low removal + Q50	0.009	-0.035	0.031	1	0	0	0	0	28	28.8
FB20% + BaseMort + 2C + low removal + NoQ	0.007	-0.079	0.09	1	0	0	0	0	46	45.9
FB20% + BaseMort + 2C + low removal + Q30	0.007	-0.045	0.04	1	0	0	0	0	33	33.3
FB20% + BaseMort + 2C + low removal + Q50	0.007	-0.036	0.034	1	0	0	0	0	27	27.4
FB20% + BaseMort + 0C + medium removal + NoQ	0.009	-0.093	0.134	1	0	0	0	0	39	38.6
FB20% + BaseMort + 0C + medium removal + Q30	0.009	-0.056	0.07	1	0	0	0	0	26	26
FB20% + BaseMort + 0C + medium removal + Q50	0.009	-0.046	0.059	1	0	0	0	0	21	20.9
FB20% + BaseMort + 2C + medium removal + NoQ	0.007	-0.097	0.137	1	0	0	0	0	37	37.4
FB20% + BaseMort + 2C + medium removal + Q30	0.007	-0.058	0.072	1	0	0	0	0	25	25.2
FB20% + BaseMort + 2C + medium removal + Q50	0.007	-0.048	0.06	1	0	0	0	0	20	20.2
FB20% + BaseMort + 0C + high removal + NoQ	0.009	-0.102	0.075	1	0	0	0	0	28	28.2
FB20% + BaseMort + 0C + high removal + Q30	0.009	-0.078	0.044	1	0	0	0	0	20	19.6
FB20% + BaseMort + 0C + high removal + Q50	0.009	-0.065	0.036	1	0	0	0	0	16	15.6
FB20% + BaseMort + 2C + high removal + NoQ	0.007	-0.107	0.08	1	0	0	0	0	29	28.4
FB20% + BaseMort + 2C + high removal + Q30	0.007	-0.08	0.047	1	0	0	0	0	19	19.1
FB20% + BaseMort + 2C + high removal + Q50	0.007	-0.067	0.04	1	0	0	0	0	15	15.1
Mortality rates reduced by 20%; 3 different % females breeding (16%, 18%, & 20%)
FB16% + Mort20%lower + 0C + no removal + NoQ	0.009	0.008	0.022	0	238.64	12.81	238.64	12.81	0	0
FB16% + Mort20%lower + 0C + no removal + Q30	0.009	0.008	0.022	0	239.25	12.5	239.25	12.5	0	0
FB16% + Mort20%lower + 0C + no removal + Q50	0.009	0.008	0.022	0	238.56	13.04	238.56	13.04	0	0
FB16% + Mort20%lower + 2C + no removal + NoQ	0.006	0.006	0.027	0	218.63	31.99	218.63	31.99	0	0
FB16% + Mort20%lower + 2C + no removal + Q30	0.006	0.006	0.027	0	218.55	30.4	218.55	30.4	0	0
FB16% + Mort20%lower + 2C + no removal + Q50	0.006	0.006	0.027	0	220.77	30.07	220.77	30.07	0	0
FB16% + Mort20%lower + 0C + very low removal + NoQ	0.009	-0.021	0.052	0.298	41.31	35.26	29.37	34.79	0	88
FB16% + Mort20%lower + 0C + very low removal + Q30	0.009	-0.014	0.035	0.634	69.58	31.65	30.97	35.74	93	82.2
FB16% + Mort20%lower + 0C + very low removal + Q50	0.009	-0.011	0.031	0.766	79.17	23.93	28.35	33.23	79	72.8
FB16% + Mort20%lower + 2C + very low removal + NoQ	0.006	-0.03	0.065	0.534	28.05	28.67	13.42	23.89	97	83.9
FB16% + Mort20%lower + 2C + very low removal + Q30	0.006	-0.018	0.039	0.848	54.17	20.2	12.41	20.46	79	74.7
FB16% + Mort20%lower + 2C + very low removal + Q50	0.006	-0.014	0.035	0.92	78.95	26.8	12.93	23.46	67	65.8
FB16% + Mort20%lower + 0C + low removal + NoQ	0.009	-0.07	0.078	1	0	0	0	0	48	48.4
FB16% + Mort20%lower + 0C + low removal + Q30	0.009	-0.042	0.035	1	0	0	0	0	36	36.2
FB16% + Mort20%lower + 0C + low removal + Q50	0.009	-0.033	0.029	1	0	0	0	0	30	29.9
FB16% + Mort20%lower + 2C + low removal + NoQ	0.006	-0.075	0.084	1	0	0	0	0	47	46.9
FB16% + Mort20%lower + 2C + low removal + Q30	0.006	-0.044	0.038	1	0	0	0	0	34	34.1
FB16% + Mort20%lower + 2C + low removal + Q50	0.006	-0.036	0.032	1	0	0	0	0	28	28
FB16% + Mort20%lower + 0C + medium removal + NoQ	0.009	-0.089	0.129	1	0	0	0	0	39	39.3
FB16% + Mort20%lower + 0C + medium removal + Q30	0.009	-0.054	0.069	1	0	0	0	0	27	27
FB16% + Mort20%lower + 0C + medium removal + Q50	0.009	-0.045	0.058	1	0	0	0	0	21	21.7
FB16% + Mort20%lower + 2C + medium removal + NoQ	0.006	-0.092	0.131	1	0	0	0	0	37	37.7
FB16% + Mort20%lower + 2C + medium removal + Q30	0.006	-0.057	0.071	1	0	0	0	0	25	25.9
FB16% + Mort20%lower + 2C + medium removal + Q50	0.006	-0.047	0.06	1	0	0	0	0	21	20.6
FB16% + Mort20%lower + 0C + high removal + NoQ	0.009	-0.093	0.063	1	0	0	0	0	29	28.8
FB16% + Mort20%lower + 0C + high removal + Q30	0.009	-0.075	0.042	1	0	0	0	0	20	20.3
FB16% + Mort20%lower + 0C + high removal + Q50	0.009	-0.064	0.034	1	0	0	0	0	16	15.8
FB16% + Mort20%lower + 2C + high removal + NoQ	0.006	-0.099	0.067	1	0	0	0	0	29	28.4
FB16% + Mort20%lower + 2C + high removal + Q30	0.006	-0.078	0.045	1	0	0	0	0	20	19.7
FB16% + Mort20%lower + 2C + high removal + Q50	0.006	-0.066	0.037	1	0	0	0	0	15	15.3
FB18% + Mort20%lower + 0C + no removal + NoQ	0.012	0.011	0.022	0	243.22	6.69	243.22	6.69	0	0
FB18% + Mort20%lower + 0C + no removal + Q30	0.012	0.012	0.022	0	243.74	6.01	243.74	6.01	0	0
FB18% + Mort20%lower + 0C + no removal + Q50	0.012	0.012	0.022	0	243.74	5.98	243.74	5.98	0	0
FB18% + Mort20%lower + 2C + no removal + NoQ	0.01	0.009	0.027	0	237.21	15.51	237.21	15.51	0	0
FB18% + Mort20%lower + 2C + no removal + Q30	0.01	0.009	0.026	0	236.94	15.76	236.94	15.76	0	0
FB18% + Mort20%lower + 2C + no removal + Q50	0.01	0.009	0.027	0	237.26	15.53	237.26	15.53	0	0
FB18% + Mort20%lower + 0C + very low removal + NoQ	0.012	-0.011	0.039	0.112	81.29	55.4	72.43	57.87	0	90.3
FB18% + Mort20%lower + 0C + very low removal + Q30	0.012	-0.008	0.032	0.3	95.06	47.47	69.69	55.73	0	84.2
FB18% + Mort20%lower + 0C + very low removal + Q50	0.012	-0.006	0.03	0.408	108.4	45.09	71.91	56.94	0	80.1
FB18% + Mort20%lower + 2C + very low removal + NoQ	0.01	-0.02	0.054	0.314	55.22	44.47	38.19	44.63	0	86.8
FB18% + Mort20%lower + 2C + very low removal + Q30	0.01	-0.013	0.038	0.58	79.52	43.74	37.47	46.11	95	79.2
FB18% + Mort20%lower + 2C + very low removal + Q50	0.01	-0.01	0.034	0.696	93.25	35.65	36.9	43.76	82	72.1
FB18% + Mort20%lower + 0C + low removal + NoQ	0.012	-0.065	0.076	1	0	0	0	0	51	51.1
FB18% + Mort20%lower + 0C + low removal + Q30	0.012	-0.039	0.035	1	0	0	0	0	38	38.5
FB18% + Mort20%lower + 0C + low removal + Q50	0.012	-0.031	0.029	1	0	0	0	0	32	32.3
FB18% + Mort20%lower + 2C + low removal + NoQ	0.01	-0.071	0.081	1	0	0	0	0	48	48.3
FB18% + Mort20%lower + 2C + low removal + Q30	0.01	-0.042	0.038	1	0	0	0	0	36	36.1
FB18% + Mort20%lower + 2C + low removal + Q50	0.01	-0.033	0.033	1	0	0	0	0	30	29.8
FB18% + Mort20%lower + 0C + medium removal + NoQ	0.012	-0.084	0.124	1	0	0	0	0	41	40.6
FB18% + Mort20%lower + 0C + medium removal + Q30	0.012	-0.052	0.068	1	0	0	0	0	28	28.1
FB18% + Mort20%lower + 0C + medium removal + Q50	0.012	-0.042	0.057	1	0	0	0	0	23	23
FB18% + Mort20%lower + 2C + medium removal + NoQ	0.01	-0.089	0.128	1	0	0	0	0	39	39
FB18% + Mort20%lower + 2C + medium removal + Q30	0.01	-0.055	0.069	1	0	0	0	0	27	27
FB18% + Mort20%lower + 2C + medium removal + Q50	0.01	-0.045	0.059	1	0	0	0	0	21	21.7
FB18% + Mort20%lower + 0C + high removal + NoQ	0.012	-0.091	0.063	1	0	0	0	0	29	29.3
FB18% + Mort20%lower + 0C + high removal + Q30	0.012	-0.072	0.041	1	0	0	0	0	21	21.2
FB18% + Mort20%lower + 0C + high removal + Q50	0.012	-0.061	0.034	1	0	0	0	0	16	16.4
FB18% + Mort20%lower + 2C + high removal + NoQ	0.01	-0.093	0.065	1	0	0	0	0	29	28.9
FB18% + Mort20%lower + 2C + high removal + Q30	0.01	-0.075	0.044	1	0	0	0	0	20	20.4
FB18% + Mort20%lower + 2C + high removal + Q50	0.01	-0.063	0.037	1	0	0	0	0	16	15.8
FB20% + Mort20%lower + 0C + no removal + NoQ	0.015	0.014	0.022	0	244.43	5.8	244.43	5.8	0	0
FB20% + Mort20%lower + 0C + no removal + Q30	0.015	0.015	0.022	0	244.68	5.88	244.68	5.88	0	0
FB20% + Mort20%lower + 0C + no removal + Q50	0.015	0.015	0.022	0	244.71	5.53	244.71	5.53	0	0
FB20% + Mort20%lower + 2C + no removal + NoQ	0.013	0.012	0.027	0	241.42	10.73	241.42	10.73	0	0
FB20% + Mort20%lower + 2C + no removal + Q30	0.013	0.012	0.027	0	242.1	9.31	242.1	9.31	0	0
FB20% + Mort20%lower + 2C + no removal + Q50	0.013	0.012	0.027	0	242.13	8.66	242.13	8.66	0	0
FB20% + Mort20%lower + 0C + very low removal + NoQ	0.015	-0.002	0.031	0.028	137.99	66.06	134.15	68.96	0	87.1
FB20% + Mort20%lower + 0C + very low removal + Q30	0.015	-0.002	0.029	0.104	139.55	60.88	126.76	68.87	0	90.4
FB20% + Mort20%lower + 0C + very low removal + Q50	0.015	-0.001	0.028	0.116	147.13	57.15	132.86	66.87	0	83.8
FB20% + Mort20%lower + 2C + very low removal + NoQ	0.013	-0.011	0.044	0.146	90.35	61.38	77.34	64.88	0	88.2
FB20% + Mort20%lower + 2C + very low removal + Q30	0.013	-0.007	0.035	0.258	107.03	53.12	81.46	63.21	0	81.1
FB20% + Mort20%lower + 2C + very low removal + Q50	0.013	-0.005	0.033	0.348	121.13	52.93	84.41	66.54	0	76.4
FB20% + Mort20%lower + 0C + low removal + NoQ	0.015	-0.062	0.075	1	0	0	0	0	52	52.6
FB20% + Mort20%lower + 0C + low removal + Q30	0.015	-0.036	0.035	1	0	0	0	0	41	41.3
FB20% + Mort20%lower + 0C + low removal + Q50	0.015	-0.028	0.03	1	0	0	0	0	35	35.3
FB20% + Mort20%lower + 2C + low removal + NoQ	0.013	-0.067	0.08	1	0	0	0	0	50	50.4
FB20% + Mort20%lower + 2C + low removal + Q30	0.013	-0.039	0.039	1	0	0	0	0	38	38.3
FB20% + Mort20%lower + 2C + low removal + Q50	0.013	-0.03	0.032	1	0	0	0	0	32	32.6
FB20% + Mort20%lower + 0C + medium removal + NoQ	0.015	-0.081	0.12	1	0	0	0	0	41	41.1
FB20% + Mort20%lower + 0C + medium removal + Q30	0.015	-0.05	0.068	1	0	0	0	0	29	29.3
FB20% + Mort20%lower + 0C + medium removal + Q50	0.015	-0.041	0.057	1	0	0	0	0	23	23.8
FB20% + Mort20%lower + 2C + medium removal + NoQ	0.013	-0.086	0.125	1	0	0	0	0	39	39.9
FB20% + Mort20%lower + 2C + medium removal + Q30	0.013	-0.053	0.07	1	0	0	0	0	27	27.8
FB20% + Mort20%lower + 2C + medium removal + Q50	0.013	-0.043	0.059	1	0	0	0	0	23	22.7
FB20% + Mort20%lower + 0C + high removal + NoQ	0.015	-0.087	0.06	1	0	0	0	0	30	29.7
FB20% + Mort20%lower + 0C + high removal + Q30	0.015	-0.07	0.041	1	0	0	0	0	22	21.7
FB20% + Mort20%lower + 0C + high removal + Q50	0.015	-0.06	0.035	1	0	0	0	0	17	16.7
FB20% + Mort20%lower + 2C + high removal + NoQ	0.013	-0.091	0.064	1	0	0	0	0	30	29.3
FB20% + Mort20%lower + 2C + high removal + Q30	0.013	-0.073	0.043	1	0	0	0	0	21	20.9
FB20% + Mort20%lower + 2C + high removal + Q50	0.013	-0.062	0.038	1	0	0	0	0	16	16.3
Mortality rates increased by 20%; 3 different % females breeding (16%, 18%, & 20%)
FB16% + Mort20%higher + 0C + no removal + NoQ	-0.003	-0.004	0.03	0	98.4	26.74	98.4	26.74	0	0
FB16% + Mort20%higher + 0C + no removal + Q30	-0.003	-0.004	0.03	0	94.9	28.18	94.9	28.18	0	0
FB16% + Mort20%higher + 0C + no removal + Q50	-0.003	-0.004	0.03	0.01	98.33	26.52	97.79	26.93	0	87.3
FB16% + Mort20%higher + 2C + no removal + NoQ	-0.005	-0.006	0.035	0	78.22	24.82	78.22	24.82	0	0
FB16% + Mort20%higher + 2C + no removal + Q30	-0.005	-0.006	0.035	0.012	76.83	24.59	76.24	25.02	0	90.3
FB16% + Mort20%higher + 2C + no removal + Q50	-0.005	-0.006	0.035	0.142	84.4	23.98	78.13	27.16	0	82.4
FB16% + Mort20%higher + 0C + very low removal + NoQ	-0.003	-0.052	0.088	0.996	3	0	0.03	0.22	71	70.7
FB16% + Mort20%higher + 0C + very low removal + Q30	-0.003	-0.029	0.042	1	0	0	0.03	0.21	51	51.9
FB16% + Mort20%higher + 0C + very low removal + Q50	-0.003	-0.024	0.036	1	0	0	0.02	0.26	41	41.4
FB16% + Mort20%higher + 2C + very low removal + NoQ	-0.005	-0.055	0.091	0.998	4	0	0.01	0.18	65	66.2
FB16% + Mort20%higher + 2C + very low removal + Q30	-0.005	-0.031	0.045	1	0	0	0	0.04	47	47.6
FB16% + Mort20%higher + 2C + very low removal + Q50	-0.005	-0.026	0.039	1	0	0	0	0.09	37	38.1
FB16% + Mort20%higher + 0C + low removal + NoQ	-0.003	-0.092	0.097	1	0	0	0	0	41	41.3
FB16% + Mort20%higher + 0C + low removal + Q30	-0.003	-0.054	0.039	1	0	0	0	0	28	28.1
FB16% + Mort20%higher + 0C + low removal + Q50	-0.003	-0.045	0.033	1	0	0	0	0	22	22.4
FB16% + Mort20%higher + 2C + low removal + NoQ	-0.005	-0.094	0.098	1	0	0	0	0	40	40.3
FB16% + Mort20%higher + 2C + low removal + Q30	-0.005	-0.056	0.042	1	0	0	0	0	27	26.8
FB16% + Mort20%higher + 2C + low removal + Q50	-0.005	-0.046	0.036	1	0	0	0	0	22	21.6
FB16% + Mort20%higher + 0C + medium removal + NoQ	-0.003	-0.108	0.144	1	0	0	0	0	35	34.6
FB16% + Mort20%higher + 0C + medium removal + Q30	-0.003	-0.066	0.074	1	0	0	0	0	23	22.4
FB16% + Mort20%higher + 0C + medium removal + Q50	-0.003	-0.056	0.061	1	0	0	0	0	17	17.5
FB16% + Mort20%higher + 2C + medium removal + NoQ	-0.005	-0.111	0.147	1	0	0	0	0	33	33.6
FB16% + Mort20%higher + 2C + medium removal + Q30	-0.005	-0.069	0.075	1	0	0	0	0	21	21.4
FB16% + Mort20%higher + 2C + medium removal + Q50	-0.005	-0.058	0.063	1	0	0	0	0	17	16.8
FB16% + Mort20%higher + 0C + high removal + NoQ	-0.003	-0.122	0.089	1	0	0	0	0	27	27
FB16% + Mort20%higher + 0C + high removal + Q30	-0.003	-0.088	0.047	1	0	0	0	0	17	17.4
FB16% + Mort20%higher + 0C + high removal + Q50	-0.003	-0.073	0.037	1	0	0	0	0	14	13.8
FB16% + Mort20%higher + 2C + high removal + NoQ	-0.005	-0.127	0.093	1	0	0	0	0	27	26.8
FB16% + Mort20%higher + 2C + high removal + Q30	-0.005	-0.09	0.048	1	0	0	0	0	17	17
FB16% + Mort20%higher + 2C + high removal + Q50	-0.005	-0.076	0.04	1	0	0	0	0	13	13.2
FB18% + Mort20%higher + 0C + no removal + NoQ	0	0	0.029	0	135.23	35.07	135.23	35.07	0	0
FB18% + Mort20%higher + 0C + no removal + Q30	0	-0.001	0.029	0	135.57	37.6	135.57	37.6	0	0
FB18% + Mort20%higher + 0C + no removal + Q50	0	-0.001	0.029	0	134.87	34.42	134.87	34.42	0	95
FB18% + Mort20%higher + 2C + no removal + NoQ	-0.002	-0.003	0.034	0	105.91	36.54	105.91	36.54	0	0
FB18% + Mort20%higher + 2C + no removal + Q30	-0.002	-0.003	0.034	0	105.7	34.53	105.7	34.53	0	0
FB18% + Mort20%higher + 2C + no removal + Q50	-0.002	-0.003	0.033	0.028	109.85	33.06	107.83	34.72	0	83.7
FB18% + Mort20%higher + 0C + very low removal + NoQ	0	-0.047	0.082	0.964	9.67	6.86	0.44	2.29	75	75
FB18% + Mort20%higher + 0C + very low removal + Q30	0	-0.026	0.042	1	0	0	0.29	1.66	55	57.3
FB18% + Mort20%higher + 0C + very low removal + Q50	0	-0.021	0.036	1	0	0	0.34	1.86	47	47
FB18% + Mort20%higher + 2C + very low removal + NoQ	-0.002	-0.051	0.088	0.988	9.67	7.87	0.16	1.35	71	71.8
FB18% + Mort20%higher + 2C + very low removal + Q30	-0.002	-0.029	0.045	0.998	30	0	0.14	1.48	51	52
FB18% + Mort20%higher + 2C + very low removal + Q50	-0.002	-0.023	0.039	1	0	0	0.08	0.84	41	42.5
FB18% + Mort20%higher + 0C + low removal + NoQ	0	-0.088	0.094	1	0	0	0	0	42	42.2
FB18% + Mort20%higher + 0C + low removal + Q30	0	-0.051	0.039	1	0	0	0	0	29	29.5
FB18% + Mort20%higher + 0C + low removal + Q50	0	-0.042	0.033	1	0	0	0	0	24	23.9
FB18% + Mort20%higher + 2C + low removal + NoQ	-0.002	-0.092	0.096	1	0	0	0	0	41	41
FB18% + Mort20%higher + 2C + low removal + Q30	-0.002	-0.054	0.042	1	0	0	0	0	28	28.1
FB18% + Mort20%higher + 2C + low removal + Q50	-0.002	-0.044	0.036	1	0	0	0	0	23	22.9
FB18% + Mort20%higher + 0C + medium removal + NoQ	0	-0.105	0.143	1	0	0	0	0	35	35.6
FB18% + Mort20%higher + 0C + medium removal + Q30	0	-0.064	0.073	1	0	0	0	0	23	23
FB18% + Mort20%higher + 0C + medium removal + Q50	0	-0.054	0.061	1	0	0	0	0	18	18.1
FB18% + Mort20%higher + 2C + medium removal + NoQ	-0.002	-0.109	0.146	1	0	0	0	0	35	34.4
FB18% + Mort20%higher + 2C + medium removal + Q30	-0.002	-0.067	0.075	1	0	0	0	0	22	22.1
FB18% + Mort20%higher + 2C + medium removal + Q50	-0.002	-0.055	0.062	1	0	0	0	0	17	17.6
FB18% + Mort20%higher + 0C + high removal + NoQ	0	-0.118	0.088	1	0	0	0	0	27	27.4
FB18% + Mort20%higher + 0C + high removal + Q30	0	-0.086	0.046	1	0	0	0	0	18	17.8
FB18% + Mort20%higher + 0C + high removal + Q50	0	-0.072	0.037	1	0	0	0	0	14	13.9
FB18% + Mort20%higher + 2C + high removal + NoQ	-0.002	-0.123	0.095	1	0	0	0	0	27	27
FB18% + Mort20%higher + 2C + high removal + Q30	-0.002	-0.088	0.049	1	0	0	0	0	17	17.3
FB18% + Mort20%higher + 2C + high removal + Q50	-0.002	-0.074	0.04	1	0	0	0	0	14	13.7
FB20% + Mort20%higher + 0C + no removal + NoQ	0.003	0.003	0.028	0	180.24	39.85	180.24	39.85	0	0
FB20% + Mort20%higher + 0C + no removal + Q30	0.003	0.003	0.028	0	177.94	39.03	177.94	39.03	0	0
FB20% + Mort20%higher + 0C + no removal + Q50	0.003	0.002	0.028	0	173.53	42.13	173.53	42.13	0	0
FB20% + Mort20%higher + 2C + no removal + NoQ	0.001	0	0.033	0	143.64	41.89	143.64	41.89	0	0
FB20% + Mort20%higher + 2C + no removal + Q30	0.001	0	0.033	0	144.82	44.29	144.82	44.29	0	96
FB20% + Mort20%higher + 2C + no removal + Q50	0.001	0	0.033	0.008	143.49	43.6	142.68	44.36	0	87.2
FB20% + Mort20%higher + 0C + very low removal + NoQ	0.003	-0.043	0.081	0.876	15.63	18.06	2.08	8.14	81	79.8
FB20% + Mort20%higher + 0C + very low removal + Q30	0.003	-0.023	0.042	0.984	50.13	14.1	2.03	7.37	63	63.9
FB20% + Mort20%higher + 0C + very low removal + Q50	0.003	-0.018	0.036	0.998	67	0	1.95	6.42	53	54.4
FB20% + Mort20%higher + 2C + very low removal + NoQ	0.001	-0.047	0.085	0.936	9.03	7.36	0.67	2.89	77	75.7
FB20% + Mort20%higher + 2C + very low removal + Q30	0.001	-0.025	0.044	0.994	72.33	59.54	0.79	6.99	57	58.2
FB20% + Mort20%higher + 2C + very low removal + Q50	0.001	-0.02	0.04	0.998	59	0	0.82	4.47	47	48.4
FB20% + Mort20%higher + 0C + low removal + NoQ	0.003	-0.086	0.094	1	0	0	0	0	44	43.7
FB20% + Mort20%higher + 0C + low removal + Q30	0.003	-0.049	0.04	1	0	0	0	0	30	30.6
FB20% + Mort20%higher + 0C + low removal + Q50	0.003	-0.04	0.033	1	0	0	0	0	25	25.1
FB20% + Mort20%higher + 2C + low removal + NoQ	0.001	-0.09	0.097	1	0	0	0	0	42	42.1
FB20% + Mort20%higher + 2C + low removal + Q30	0.001	-0.052	0.043	1	0	0	0	0	29	29.2
FB20% + Mort20%higher + 2C + low removal + Q50	0.001	-0.042	0.036	1	0	0	0	0	24	23.8
FB20% + Mort20%higher + 0C + medium removal + NoQ	0.003	-0.103	0.142	1	0	0	0	0	36	36.1
FB20% + Mort20%higher + 0C + medium removal + Q30	0.003	-0.063	0.072	1	0	0	0	0	23	23.5
FB20% + Mort20%higher + 0C + medium removal + Q50	0.003	-0.052	0.061	1	0	0	0	0	19	18.9
FB20% + Mort20%higher + 2C + medium removal + NoQ	0.001	-0.106	0.143	1	0	0	0	0	35	35.2
FB20% + Mort20%higher + 2C + medium removal + Q30	0.001	-0.064	0.074	1	0	0	0	0	23	22.8
FB20% + Mort20%higher + 2C + medium removal + Q50	0.001	-0.054	0.063	1	0	0	0	0	18	18.2
FB20% + Mort20%higher + 0C + high removal + NoQ	0.003	-0.116	0.087	1	0	0	0	0	28	27.6
FB20% + Mort20%higher + 0C + high removal + Q30	0.003	-0.084	0.047	1	0	0	0	0	18	18.2
FB20% + Mort20%higher + 0C + high removal + Q50	0.003	-0.07	0.038	1	0	0	0	0	14	14.3
FB20% + Mort20%higher + 2C + high removal + NoQ	0.001	-0.121	0.092	1	0	0	0	0	28	27.4
FB20% + Mort20%higher + 2C + high removal + Q30	0.001	-0.086	0.05	1	0	0	0	0	18	17.7
FB20% + Mort20%higher + 2C + high removal + Q50	0.001	-0.072	0.041	1	0	0	0	0	14	13.9
